1       **An *In Vivo* Analysis of the Functional Motifs of DEAD-box RNA Helicase**  
2                   **Me31B in *Drosophila* Fertility and Germline Development**

3  
4       **Evan Kara<sup>1</sup>, Aidan McCambridge<sup>1</sup>, Megan Proffer<sup>1</sup>, Carol Dilts<sup>1</sup>, Brooke Pumnea<sup>1</sup>,**  
5           **John Eshak<sup>1</sup>, Korey A. Smith<sup>1</sup>, Isaac Fielder<sup>1</sup>, Dominique A. Doyle<sup>2</sup>, Bianca M.**  
6       **Ortega<sup>2</sup>, Yousif Mukatash<sup>1</sup>, Noor Malik<sup>1</sup>, Ammaar R. Mohammed<sup>1</sup>, Deep Govani<sup>1</sup>,**  
7                   **Matthew G. Niepielko<sup>2,3</sup>, and Ming Gao<sup>1,\*</sup>**

8                   1. Biology Department, Indiana University Northwest, Gary, IN, USA

9                   2. School of Integrative Science and Technology, Kean University, Union, NJ, USA

10                   3. Biology Department, Kean University, Union, NJ, USA

11

12       **\*Correspondence**

13       M. Gao, Biology Department, Marram Hall 310, 3400 Broadway, Gary, IN 46408, USA

14       Fax: +1 219 980 7125

15       Tel: +1 219 980 6722

16       Email: [minggao@iun.edu](mailto:minggao@iun.edu)

17

18       **Abstract**

19       In *Drosophila* germline, Me31B is a putative ATP-dependent, RNA helicase that plays  
20       role in post-transcriptional RNA regulation to ensure the correct spatial and temporal

21 expression of the mRNAs, a process crucial for proper germline development and  
22 fertility. However, Me31B's *in vivo* working mechanism remains unclear. In this study,  
23 we aim to analyze the functions of Me31B's key domains/motifs to understand how  
24 these domains/motifs operate to fulfill the protein's overall activities. We generated  
25 *Drosophila* strains mutant for six important motifs including three ATPase/helicase  
26 motifs (DEAD-box, DVLARAK, and HRIGR), the N-terminal domain (N-ter), the C-  
27 terminal domain (C-ter), and a protein-binding motif (FDF motif-binding motif). In  
28 characterizing these mutants, we observed that the three ATPase/helicase motif  
29 mutations cause dominant female sterility which is associated with developmental  
30 defects in oogenesis and embryogenesis. Follow-up examination of the DVLARAK motif  
31 mutant revealed its abnormalities in germline mRNA localization and transcript level.  
32 The Me31B N-ter domain (deletion of C-ter), C-ter domain (deletion of N-ter), and  
33 mutation of FDF motif-binding motif led to a decrease in female fertility and abnormal  
34 subcellular Me31B localizations in the egg chambers. Moreover, deletion of Me31B N-  
35 ter or C-ter motif results in a decrease of Me31B protein levels in the ovaries. This study  
36 indicates that these six motifs of Me31B play different roles to contribute to Me31B's  
37 whole-protein functions like ATPase, RNA helicase, protein stability, protein localization,  
38 and partner protein binding, which are crucial for germline development and fertility.  
39 Considering Me31B protein family's conserved presence in both *Drosophila* germline  
40 and soma (for example, neurons) and in other organisms such as yeast, worm, mouse,  
41 and human, the results from this study could expand our understanding of Me31B  
42 helicase family's general working mechanisms in different cell types and species.  
43

## 44 **Introduction**

45 *Drosophila* Me31B is an evolutionarily conserved, ATP-dependent, DEAD-box RNA  
46 helicase that are important for *Drosophila* germline development and fertility [1-5], with  
47 homologs like CGH-1 (*C. elegans*) [6, 7], DjCBC-1 (planarians) [8, 9], Xp54 (*Xenopus*)  
48 [10, 11], p54 (mouse) [12, 13], and DDX6/Rck (humans) [14-18] playing similar roles in  
49 diverse animal species. In these animals, the main role of Me31B family helicases lies  
50 in their post-transcriptional RNA regulation including RNA storage, transportation,  
51 translational regulation, stabilization, and decay, which ensure the expression of the  
52 messages at the correct time and location, and lead to proper germline functioning and  
53 development [14, 19-23].

54 *Drosophila* Me31B has been employed as a useful model to study the helicases in the  
55 family. Me31B's essentiality for *Drosophila* germline has been underscored by that  
56 *me31B* loss-of-function mutation or strong knockdown (KD) cause severe egg chamber  
57 development defects or early oogenesis arrest, respectively [1, 24]. In normal egg  
58 chambers, Me31B proteins express and aggregate into ribonucleoprotein (RNP)  
59 complexes, granular assemblies of proteins and RNAs. In these granules, Me31B  
60 complexes with other partner proteins like Tral (a translational repressor protein that  
61 usually complexes with Me31B in various types of RNP granules) to render post-  
62 transcriptional controls on the RNAs within, a process necessary for proper germline  
63 development [3, 25-29]. So far, our understanding of Me31B function mostly came from  
64 using *Drosophila* strains with complete loss-of-function alleles of *me31B* gene, strains  
65 with a significant loss of Me31B proteins, or biochemical analysis of the protein *in vitro*.  
66 Therefore, the protein's molecular-level working mechanism *in vivo* remains unclear. In

67 this study, we aim to analyze the *in vivo* functions of important domains/motifs of Me31B  
68 and then understand how they fit together to contribute to Me31B's whole-protein  
69 activities.

70 This study focuses on six Me31B domain/motifs (domains and motifs will be called  
71 motifs from here for simplicity): DEAD-box motif (AA 207 – 210), DVLARAK motif (AA  
72 97 – 103), HRIGR motif (381 – 385), N-ter motif (AA 1 – 267), C-ter motif (AA 268 –  
73 459), and FDF motif-binding motif (AA 285 – 289). Previous research suggests that the  
74 first three motifs (DEAD-box, DVLARAK, and HRIGR) are crucial for the  
75 ATPase/helicase activities of Me31B [30-32]; The two large N-ter and C-ter motifs each  
76 contain a RecA-like domain and participate in a wide spectrum of activities including  
77 ATPase/helicase, protein binding, and assembly into RNP granules [19, 30, 33]; The  
78 FDF motif-binding motif enables Me31B to physically bind to the FDF motifs on  
79 translational repressor partners like Tral or EDC3 [33-36]. To study these motifs' *in vivo*  
80 functions, we used the CRISPR gene-editing technique and created *Drosophila* strains  
81 carrying point mutations that disrupt the motifs' function or deletion mutations in the  
82 *me31B* genes (Figure 1). Analysis of the resulting *me31B* mutants revealed that the six  
83 motifs are important for *Drosophila* fertility and germline development, while playing  
84 different molecular-level roles in localizing germline RNA, maintaining germline RNA  
85 level, stabilizing Me31B protein and localizing the protein, and interactions with Me31B  
86 partner proteins.

87

## 88 **Results and Discussions**

89 **Me31B ATPase/helicase motif mutations lead to dominant female sterility.**

90 Although structural and functional studies on Me31B and its homologs identified several  
91 ATPase/helicase motifs in Me31B and suggested these motifs' potential functions in  
92 ATP hydrolysis, RNA binding, and RNA translational regulation [11, 19, 30, 32, 34, 37,  
93 38], the *in vivo* functions of the motifs have not been investigated. To study this, we  
94 introduced single or multiple point mutations to three conserved ATPase/helicase motifs  
95 individually: E208A for DEAD box motif (DEAD→DAAD), R101A and K103A for  
96 DVLARAK motif (DVLARAK→DVLAAAA), and R385Q for HRIGR motif  
97 (HRIGR→HRIGQ). The resulting *me31B* alleles are named *me31B<sup>E208A</sup>*, *me31B<sup>DVLAAAA</sup>*,  
98 and *me31B<sup>R385Q</sup>*, respectively (illustrated in Figure 1). The introduced mutations were  
99 reported to disrupt the motifs' normal functions in Me31B homologs or structurally  
100 similar proteins [30-32, 38-41]. When maintaining the three mutant strains, we  
101 immediately noticed that all three alleles dominantly cause female sterility. Specifically,  
102 *me31B<sup>E208A</sup>/+*, *me31B<sup>DVLAAAA</sup>/+*, and *me31B<sup>R385Q</sup>/+* heterozygous female flies do not  
103 produce any viable progeny in the presence of males from wildtype *w<sup>1118</sup>* strain. In  
104 contrast, *me31B<sup>E208A</sup>/+*, *me31B<sup>DVLAAAA</sup>/+*, and *me31B<sup>R385Q</sup>/+* heterozygous male flies  
105 were able to fertilize *w<sup>1118</sup>* females and produce viable progenies bearing the mutant  
106 *me31B* alleles, suggesting that the three *me31B* alleles cause sterility in females only.  
107 To find out what caused the sterility, we first checked *me31B<sup>E208A</sup>/+*, *me31B<sup>DVLAAAA</sup>/+*,  
108 and *me31B<sup>R385Q</sup>/+* strains for their embryo laying, development, and morphology.  
109 Although embryo laying was observed from all three strains, none (0%) of their embryos  
110 (n = 541 for *me31B<sup>E208A</sup>/+*, n = 100 for *me31B<sup>DVLAAAA</sup>/+*, and n = 17 for *me31B<sup>R385Q</sup>/+*)  
111 were able to develop to larva or later stages on grape agar plates (see Materials and

112 Methods for the hatchability assay condition). A closer examination of the un-hatched  
113 embryos from the three mutants showed that 78% of the embryos from *me31B<sup>E208A</sup>/+*,  
114 33% of the embryos from *me31B<sup>DVLA AAAA</sup>/+*, and 100% of the embryos from  
115 *me31B<sup>R385Q</sup>/+* had one or more types of patterning defects like fused dorsal  
116 appendages, very short, or no dorsal appendages (Figure 2A), consistent with the  
117 strains being sterile. Among the three strains, *me31B<sup>R385Q</sup>/+* showed the most severe  
118 phenotype: they laid few embryos, and all the embryos laid had severe egg-shell shape  
119 defects besides the complete missing of dorsal appendages (Figure 2A).

120 The embryonic defects in the three mutants indicate that their oogenesis did not  
121 proceed normally, so we examined their ovaries. In *me31B<sup>E208A</sup>* and *me31B<sup>DVLA AAAA</sup>*  
122 mutant ovaries, we observed defects in nurse cell dumping, a process in which the  
123 nurse cells completely expel all their cytoplasm into late-stage eggs (reviewed in [42]).  
124 In the *me31B<sup>E208A</sup>* mutant, 52% of the stage-14 eggs (n = 13) were still connected with  
125 egg chamber tissues that contain nurse cell materials (Figure 2B), indicating incomplete  
126 nurse cell dumping. This “dumpleless” phenotype is more prominent in *me31B<sup>DVLA AAAA</sup>*  
127 mutant: approximately 78% of *me31B<sup>DVLA AAAA</sup>* stage-14 egg chambers (n = 32) did not  
128 complete dumping, and the “un-dumped” egg chamber regions were larger than that in  
129 the *me31B<sup>E208A</sup>* mutant (Figure 2C). Consistent with this egg development defect, the  
130 *me31B<sup>DVLA AAAA</sup>* mutant showed reduced egg lay when compared to the wildtype control  
131 (Supplementary Figure 1). These phenotypes mimic previously reported dumpleless  
132 phenotypes in the *dcp-1* (encoding a caspase involved in apoptosis) mutant egg  
133 chambers, which also lead to decreased egg lay and early embryo development arrest  
134 [43]. The *dcp-1* mutation-induced dumpleless phenotypes and sterility were associated

135 with abnormal nucleus envelope breakdown and cytoskeleton organization during nurse  
136 cell apoptosis and dumping [43]. Whether the same mechanism is involved in the  
137 *me31B<sup>E208A</sup>* and *me31B<sup>DVLAAAA</sup>* mutations remains to be analyzed. The most severe  
138 oogenesis defects were observed in the *me31B<sup>R385Q</sup>* mutant, as we observed frequent  
139 egg chamber degenerations at early-to-mid stages (Figure 2D), consistent with this  
140 mutant's few egg lay and sterility.

141 The sterility and defects in oogenesis and embryogenesis in all three mutants suggests  
142 that each ATPase/helicase motif is needed for *Drosophila* germline growth, and their  
143 cooperative actions are likely needed to output the correct ATPase/helicase function. An  
144 explanation for these mutations being dominant could be that the mutations introduced  
145 detrimental functions that leads to the mutant Me31B protein being "toxic" to germline  
146 cells. This explanation is supported by previous research on similar mutations made in  
147 other RNA helicases. For example, in eIF4A, another DEAD-box RNA helicase  
148 important for germline mRNA translational control [44, 45], **DEAD**→**DQAD** and  
149 **HRIGR**→**HRIGQ** mutations cause the protein to become dominant negative in  
150 translation *in vitro* [46-48]. As another example, in an assay of Xp54 (Me31B homolog in  
151 *Xenopus*)'s effect on tethered RNAs, **DEAD**→**DQAD** mutation, **DILARAK** (homologous  
152 to **DVLARAK** in Me31B)→**DILAAAA** mutation, and **HRIGR**→**HRIGQ** mutations changed  
153 the protein's regulation on substrate RNAs from translational repression to translational  
154 activation [30]. These reports made us postulate that the dominant sterility effects of  
155 *me31B<sup>E208A</sup>*, *me31B<sup>DVLAAAA</sup>*, and *me31B<sup>R385Q</sup>* mutations may be caused by altered RNA  
156 translational control activity of the mutated proteins.

157 It is integral to note that the HRIGR→HRIGQ mutation caused much more severe  
158 germline phenotypes than the DEAD→DAAD or DVLARAK→DVLAAAA mutations. We  
159 suspect this may be either that 1) substituting an ATPase/helicase motif's key amino  
160 acid (like arginine, R) to glutamine (Q) causes more detrimental effects than alanine (A),  
161 or that 2) the HRIGR motif plays a separate and more important roles than the DEAD  
162 and DVLARAK motifs. Previous research in other systems provided conceptual support  
163 for both explanations. For the first argument, DQAD mutation in the DEAD-box motif of  
164 GLH-1 (a conserved germ granule RNA helicase in *C. elegans*) led to a more severe  
165 fertility decrease and embryo arrest phenotypes than DAAD mutation [49, 50]. For the  
166 second, DEAD→DQAD mutation in the DEAD-box helicase eIF4A abolish the protein's  
167 ATPase activity but retain a small amount of RNA-binding activity, while the  
168 HRIGR→HRIGQ mutation abolishes RNA-binding ability but retains some ATPase  
169 activity [46], suggests that the HRIGR motif may perform unique steps/roles in the  
170 helicase's enzymatic actions.

171

## 172 **Me31B helicase activity functions in *nos* localization by modulating *osk* and *nos*** 173 **transcript levels**

174 Considering Me31B's known role in post-transcriptional RNA regulation on important  
175 germline mRNAs such as *nanos* (*nos*), we investigated whether the above  
176 ATPase/helicase mutations affect *nos* localization to its germ plasm destination in late-  
177 stage eggs (germ plasm is a special cytoplasm at the posterior pole of late-stage eggs  
178 and early embryos; germ plasm contains mRNAs needed for processes including  
179 embryo patterning and germ cell formation. For reviews, see [51-55]). Normal *nos*



180 localization occurs through the Oskar-dependent formation of homotypic clusters within  
181 germ granules, aggregates that contain multiple copies of *nos* transcripts [56, 57]. We  
182 tested this hypothesis with the *me31B<sup>DVLAAAA</sup>/+* strain and performed single molecule  
183 fluorescent *in situ* hybridization (smFISH) on stage 13 oocytes to identify both  
184 unlocalized *nos* transcripts and *nos* clusters in the posterior germ plasm. Using  
185 previously established imaging and image analysis techniques [56, 57] (See Material  
186 and Methods), we quantified the number of *nos* transcripts that reside within homotypic  
187 clusters in the *me31B<sup>DVLAAAA</sup>* mutant and a control CRISPR strain (*me31B<sup>WT</sup>-GFP*) with  
188 wildtype *me31B* gene (Figure 3A). We found that the average number of *nos* transcripts  
189 found in a homotypic cluster of the control was  $6.42 \pm 0.47$  transcripts per cluster which  
190 were not significantly different from the previously published average of  $7.58 \pm 0.42$   
191 transcript per *nos* cluster in *yellow white* flies ( $p = 0.12$ ) [57], suggesting that our  
192 CRISPR genome modifications like adding the GFP tag does not affect *nos* localization.  
193 However, in the *me31B<sup>DVLAAAA</sup>* mutant, the average number of *nos* transcripts found in a  
194 homotypic cluster is  $2.33 \pm 0.21$ , a significant reduction when compared to the  
195 *me31B<sup>WT</sup>-GFP* control ( $p < 0.0001$ ). Together, these data suggest that the Me31B  
196 helicase activity influences *nos* localization to the posterior germ plasm.

197 We next explored the mechanisms by which Me31B influences *nos* localization.  
198 Recently, it has been shown using computational modeling and experimental validation  
199 that the localization of *nos* is influenced by 1) the number of *nos* transcripts that are  
200 expressed, 2) the amount of Osk in the system, and 3) *nos*'s clustering factor, a  
201 quantifiable effect that, in conjunction with transcript and Osk levels, regulates the  
202 number of transcripts that can accumulate within a homotypic cluster [57, 58]. To

203 identify whether *me31B<sup>DVLAAAA</sup>* affects one or more of these mechanisms, we first  
204 conducted RT-PCR to measure the level of *nos* and *osk* RNAs in the system. We found  
205 that *nos* transcript levels were reduced to 61% ± 7% of wild-type levels and *osk* levels  
206 were reduced to 56% ± 4% when compared to wild-type ( $p < 0.05$ ) (Figure 3C). To  
207 determine whether these changes can account for the observed reduction of *nos*  
208 homotypic cluster sizes in the *me31B<sup>DVLAAAA</sup>* mutant, we used computational modeling  
209 to recapitulate *nos* localization *in silico* by adjusting a previously published model's  
210 parameters [58] from 1.00 to 0.61 for *nos* transcript levels and from 1.00 to 0.56 for Osk  
211 levels (See Material and methods). Modeled *nos* homotypic clusters contained an  
212 average of 2.86 transcripts per cluster which was not significantly different from the  
213 average produced by the *me31B<sup>DVLAAAA</sup>* mutant ( $p = 0.988$ ) (Figure 3B). Together, these  
214 data suggest that the mechanism creating the *nos* localization defect in *me31B<sup>DVLAAAA</sup>*  
215 mutant is caused by a combined effect generated by the reduction of *nos* and *osk*  
216 levels.

217 Me31B is a known component of an ATP-dependent assembly of a stable, repressed  
218 ribonucleoprotein particle (RNP) containing *nos* [3, 22]. In the *me31B<sup>DVLAAAA</sup>* mutant,  
219 ATP-dependent helicase activity is presumably disrupted, causing a reduction of *nos*  
220 transcripts (Figure 3C). Combining our new data with previous findings that Me31B  
221 functions in post-transcriptional mRNA regulation like RNA stability control [1-3, 28, 36],  
222 we suggest that Me31B functions in stabilizing unlocalized RNPs containing *nos* and  
223 *osk*, allowing for stable mRNAs to reach and become incorporated into the germ plasm.  
224 Furthermore, we suggest that disruption of DVLAAAA motif results in a destabilization of  
225 mRNAs that have not localized to the germ plasm, resulting in a decrease in *nos* and

226 *osk* that are available to form the germ plasm and ultimately reducing the *nos*  
227 localization. Additional germ plasm mRNAs such as *cycB*, *pgc*, and *gcl* also diffuse to  
228 the posterior RNPs containing a single transcript and form homotypic clusters within  
229 germ granules [56]. Thus, future studies should explore whether Me31B's helicase  
230 activity is specific to *nos* or has a more global role in stabilizing unlocalized germ plasm  
231 mRNAs. To find out whether *nos* and *osk* transcripts level changes also occur in the  
232 other two ATPase/helicase mutants (*me31B<sup>E208A</sup>/+* and *me31B<sup>R385Q</sup>/+*), we measured  
233 the transcript levels of the two RNAs in the two mutants. To our surprise, in  
234 *me31B<sup>E208A</sup>/+* flies, *nos* level remains comparable (104% ± 7%) to *w<sup>1118</sup>* control strain,  
235 while *osk* mRNA level is significantly up-regulated (162% ± 12%) (Figure 3D). In  
236 *me31B<sup>R385Q</sup>/+* flies, *nos* mRNA showed a significant decrease (44% ± 2%), while *osk*  
237 level showed a significant increase (194% ± 12%) when compared to the control (Figure  
238 3E). Comparing the changes of *nos* and *osk* between the three ATPase/helicase  
239 mutants, (compare Figure 3C, D, and E), we found that the three dominant-sterile  
240 mutations caused nonuniform effects on the levels of *nos* and *osk*. This suggests that  
241 the three motifs play different roles in maintain germline mRNA levels or they are  
242 responsible for maintaining different RNAs. From this, we further suggest that the  
243 change of *nos* and *osk* levels cannot be the only cause for the sterility of the three  
244 mutants. Further studies are needed to reveal and contrast how different  
245 ATPase/helicase motif mutations globally affects germline RNAs.

246

247 **Me31B N-ter motif, C-ter motif, and FDF motif-binding motif mutations decrease**  
248 **female fertility**

249 We next analyzed the functions the Me31B N-ter motif (amino acids 1 – 267), C-ter  
250 motif (amino acids 268 – 459), and FDF motif-binding motif (amino acids 285 – 289).  
251 The N-ter motif contains a RecA-like domain and contributes to the protein's ATP  
252 binding, helicase activity, and P-body assembly ability [19, 30]. The C-ter motif also  
253 contains a RecA-like domain and contributes to the protein's ATP hydrolysis, helicase  
254 activity, RNA translational repression, partner-protein binding, and P-body assembly  
255 ability [30, 33, 35, 59]. The FDF motif-binding motif allows Me31B to physically interact  
256 with FDF motifs in partner RNA repressor proteins like Tral and EDC3 [3, 4, 28, 33, 34,  
257 36]. To study these motifs' contributions to Me31B whole-protein activities, we  
258 generated *me31B<sup>N-ter</sup>*, *me31B<sup>C-ter</sup>*, *me31B<sup>FDF</sup>*, and *me31B<sup>WT</sup>* alleles which contain the N-  
259 ter coding sequence, the C-ter coding sequence, point mutations in FDF motif-binding  
260 motif, and wildtype *me31B* gene (as control), respectively (illustrated in Figure 1). We  
261 do note that our attempts to generate the original N-ter (AA 1 - 267) and C-ter (AA 268 -  
262 459) mutations were hindered by technical difficulties, but we were able to generate N-  
263 ter (AA 1 - 276) and C-ter (AA 277 - 459) mutations instead, so the latter constructs  
264 were used in this study. We first screened the mutants homozygous for the three alleles  
265 (*me31B<sup>N-ter</sup>*, *me31B<sup>C-ter</sup>*, and *me31B<sup>FDF</sup>*) for their fertility by using a previously reported  
266 female fertility assay [60]. In this assay, the egg laying and progeny production  
267 (hatchability) were separately analyzed to yield a more complete understanding of how  
268 the fertility were affected in these mutants. The assay showed that *me31B<sup>N-ter</sup>*, *me31B<sup>C-</sup>*  
269 *ter*, and *me31B<sup>FDF</sup>* mutant females showed a significant fertility decrease when

270 compared to the *me31B<sup>WT</sup>* control (Figure 4A). Specifically, in the egg laying part, a  
271 *me31B<sup>WT</sup>* control female fly laid an average of 117 eggs during the assay period, while  
272 a *me31B<sup>N-ter</sup>*, *me31B<sup>C-ter</sup>*, and *me31B<sup>FDF</sup>* fly laid an average of 68, 29, and 77 eggs,  
273 respectively, a significant decrease of 42.9%, 75.2%, and 34.2%, respectively (Figure  
274 4A). In the progeny production part, a *me31B<sup>WT</sup>* control female produced an average of  
275 106 progeny flies, while a *me31B<sup>N-ter</sup>*, *me31B<sup>C-ter</sup>*, and *me31B<sup>FDF</sup>* fly produced 47, 0, and  
276 75 progenies, a significant decrease of 55.7 % and 100% and an insignificant decrease  
277 of 29.2%, respectively (Figure 4B). The obvious absence of progenies from the  
278 *me31B<sup>C-ter</sup>* mutant indicated that the *me31B<sup>C-ter</sup>* females were sterile. To validate this,  
279 we collected the eggs (n = 97) from *me31B<sup>C-ter</sup>* females (accompanied by *w<sup>1118</sup>* males)  
280 on grape-juice agar plates and examined the eggs' development. We observed that  
281 none of the eggs developed to larva or later stages and that all the eggs showed  
282 morphological defects including fused dorsal appendages (n = 66, 68% off the eggs) or  
283 no dorsal appendages (n = 31, 32% of the eggs) (Figure 4D), consistent with *me31B<sup>C-ter</sup>*  
284 females being sterile.

285 We calculated the egg hatchability rate of the three mutants by dividing the number of  
286 viable progenies by the number of eggs laid. The hatchability rates of *me31B<sup>N-ter</sup>* and  
287 *me31B<sup>C-ter</sup>* strains are 68.3% and 0%, respectively, a significant decrease when  
288 compared to the control's 90.8% hatchability rate (Figure 4C). For the *me31B<sup>FDF</sup>* strain,  
289 the hatchability (97.1%) is not significantly different from the control (Figure 4C).

290 We conclude that Me31B's N-ter or C-ter motifs (when expressed alone) and mutation  
291 in the FDF motif-binding motif cause *Drosophila* female fertility decrease. Particularly,  
292 *me31B<sup>N-ter</sup>* mutant and *me31B<sup>C-ter</sup>* mutant cause defects in both egg-lay quantity and

293 egg hatchability. However, we cannot neglect that the sterility of *me31B<sup>C-ter</sup>* mutant is a  
294 stronger fertility defect than the *me31B<sup>N-ter</sup>* mutant, suggesting the two domains'  
295 different importance in maintaining fertility. Considering that *me31B* is an essential gene  
296 and its loss-of-function mutations are lethal [1], we were surprised to see that either  
297 Me31B N-ter or C-ter motif (when expressed alone) is enough to support fly viability,  
298 suggesting that either motif is able to provide certain essential, full-length-protein  
299 functions that enables *Drosophila* growth. Comparatively, *me31B<sup>FDF</sup>* strain showed the  
300 smallest fertility decrease with no measurable defects in egg hatchability. This means  
301 that the disruption of Me31B's FDF-motif binding function has only a mild negative effect  
302 on fertility.

303

#### 304 **Me31B N-ter motif, C-ter motif mutations decrease Me31B protein level.**

305 To follow up with the fertility defects in the *me31B<sup>N-ter</sup>*, *me31B<sup>C-ter</sup>*, and *me31B<sup>FDF</sup>*  
306 mutants, we hypothesize that these mutations may have changed Me31B protein  
307 stability and therefore reduced the amount of protein in the germline. To test this, we  
308 took advantage of the GFP-tags fused to the wildtype and mutant Me31B proteins and  
309 used anti-GFP Western blots to quantify the proteins in the ovaries of the mutant  
310 strains. We observed that the Me31B<sup>N-ter</sup> and Me31B<sup>C-ter</sup> protein levels are 40% and  
311 11% of the Me31B<sup>WT</sup> control, respectively (Figure 5A and 5B). The Me31B<sup>FDF</sup> protein  
312 level (114%) is comparable to the Me31B<sup>WT</sup> control. We conclude that the N-ter and C-  
313 ter motifs are important for maintaining Me31B protein level and deleting either half of  
314 the protein likely destabilized the protein. We also suggest that the Me31B<sup>C-ter</sup> protein  
315 (N-terminal deletion) is even less stable than the Me31B<sup>N-ter</sup> protein (C-terminal

316 deletion). Together with the fertility experiments (Figure 4), we noticed that the mutant  
317 strains' fertility and their mutant protein expression level share a similar trend, with  
318 *me31B<sup>C-ter</sup>* mutant showing complete sterility and the least level of protein expression  
319 and *me31B<sup>FDF</sup>* mutant showing a mild fertility decrease and near wildtype-level protein  
320 expression (compare Figure 4 and Figure 5B). We speculate that, besides the likely  
321 altered Me31B protein functions, the change of protein abundance could also be a  
322 factor that decreased the fertility of the mutants.

323

### 324 **Me31B N-ter motif, C-ter motif, and FDF motif-binding motif mutations alter** 325 **Me31B subcellular localization**

326 Me31B is abundantly expressed in the cytoplasm of nurse cells and developing oocytes  
327 in *Drosophila* ovaries. In these cells, Me31B complexes with partner protein Tral and  
328 aggregate together into RNP granules including perinuclear granules (nuage granules)  
329 in nurse cells, P-body/sponge body granules in nurse cells and oocytes, and germ  
330 plasm granules in oocytes [1, 24, 28]. To find out whether the *me31B<sup>N-ter</sup>*, *me31B<sup>C-ter</sup>*,  
331 and *me31B<sup>FDF</sup>* mutations affect Me31B subcellular localization, we used the GFP-tags  
332 on the Me31B proteins to visualize them in the ovary cells and used anti-Tral  
333 immunostaining to mark the germline RNP granules.

334 In the early-stage egg chambers (Figure 6A), wildtype Me31B<sup>WT</sup>-GFP and Tral both  
335 localize to the nuage granules and the P body/sponge body granules in the nurse cells  
336 and developing oocytes (Figure 6A, first row). The two proteins showed extensive  
337 overlap at these granules, suggesting likely colocalization. This localization pattern of  
338 Me31B<sup>WT</sup>-GFP and Tral is indistinguishable from the wildtype proteins in Oregon-R

339 strains or GFP-Trap strains carrying wildtype *me31B* genes [1, 24]. However, in  
340 *me31B<sup>N-ter</sup>*, *me31B<sup>C-ter</sup>*, *me31B<sup>FDF</sup>* egg chambers, the three mutant Me31B-GFP proteins  
341 were conspicuously more diffused in the nurse cells and oocytes, and they no longer  
342 overlap with Tral whose localization remain similar to that in the *me31B<sup>WT</sup>* control  
343 (Figure 6A, 3 bottom rows). This indicates that Me31B N-ter motif, C-ter motif, and the  
344 FDF motif-binding motif are needed for Me31B's aggregation status. Furthermore, the  
345 three mutant proteins each showed distinct localization/distribution patterns. Me31B<sup>N-ter</sup>-  
346 GFP proteins are found in the nurse cell nucleus (Figure 6A, second row), which is  
347 further confirmed by co-staining the egg chambers with DNA stain DAPI  
348 (Supplementary Figure 3). Although a small number of Me31B<sup>C-ter</sup>-GFP aggregates  
349 were observed (Figure 6A, third row), they are fewer and smaller than Me31B<sup>WT</sup>-GFP  
350 aggregates. From these observations, we conclude that Me31B's proper aggregation  
351 into germline RNP granules requires the presence of both the N-ter motif and C-ter  
352 motif. Previous studies suggest that the two motifs contain different sequence  
353 components and therefore different potential functions. The N-ter motif contains several  
354 ATPase/helicase motifs including DEAD-box motif and DVLA AAA motif but no known  
355 protein-binding motifs [30-32, 35]; The C-ter motif contains several protein-binding  
356 motifs and one putative helicase motif, HRIGR) [10, 19, 30, 33, 35, 59]. This means that  
357 Me31B likely uses its RNA-interaction ability on both N-ter and C-ter motifs and the  
358 protein-binding ability on the C-ter motif to aggregate into the RNP granules. In line with  
359 this speculation, the failure of Me31B<sup>FDF</sup>-GFP to aggregate (Figure 6A, bottom row)  
360 suggests that interaction/recruitment by FDF-motif proteins like Tral and EDC3 [34, 61]  
361 is necessary for Me31B's aggregation process. We note that Me31B<sup>FDF</sup>-GFP's failure to



362 aggregate is independent of its protein expression level (Figure 5). Together with the  
363 mild fertility decrease of the *me31B<sup>FD</sup>* strain (Figure 4), we suggest that Me31B's  
364 aggregation status per se only has a small influence on *Drosophila* fertility. Another  
365 aggregation factor in Me31B protein is the two predicted Intrinsically Disordered  
366 Regions (IDRs) at the N-ter end (AA 1- 53) and the C-ter ends (AA 431 – 459),  
367 respectively. Deleting the IDRs caused rapid self-assembly of Me31B into aggregate-  
368 like structures *in vitro*, so the IDRs were suggested to attenuate the interactions  
369 between the folded N-ter and C-ter motifs [62]. From the above pieces of evidence,  
370 Me31B aggregation to germline RNP granule could be a complex interplay between  
371 RNA-interacting, partner protein binding, and IDRs.

372 About the confounding nuclear localization of Me31B<sup>N-ter</sup> proteins, we speculate that  
373 Me31B may be a nucleocytoplasmic shuttling protein with a Nuclear Localization Signal  
374 (NLS) sequence in the N-terminal motif. This NLS sequence leads Me31B into the  
375 nucleus, and then the C-terminal motif mediates the protein's export and retaining in the  
376 cytoplasm. This speculation is conceptually supported by the nucleocytoplasmic  
377 shuttling activities of DDX6 (human homolog of Me31B) [59] and Xp54 (*Xenopus*  
378 homolog) [11] in cell culture models. However, our efforts to identify a Nuclear  
379 Localization Signal (NLS) sequence by using prediction tools (NLStradamus [63], cNLS  
380 Mapper [64], and SeqNLS Prediction Server [65]) were unsuccessful. Although we were  
381 able to locate amino acid sequences in Me31B (KSKLKLPPKDNRFK and  
382 CIPVLEQIDP) that are homologous to the putative NLS and Nuclear Export Signals  
383 (NES) sequences in DDX6 [59] respectively, experimental evidence is still needed to  
384 validate their *in vivo* functionality. We do not exclude the possibility that the N-terminal

385 NLS is just a non-functional sequence that is normally masked in folded, full-length  
386 Me31B protein, and the sequence was accidentally exposed to nucleus transportation  
387 machinery upon the deletion of the C-terminal motif.

388 In the early-to-mid stage egg chambers (Figure 6B), we observed that Me31B  
389 enrichment in developing oocytes is abolished in the three mutants. In the *me31B<sup>WT</sup>*  
390 control egg chambers, Me31B<sup>WT</sup>-GFP and Tral both were highly enriched in the  
391 developing oocytes, with the two proteins extensively overlapping (Figure 6B, first row).  
392 However, in the *me31B<sup>N-ter</sup>* and *me31B<sup>C-ter</sup>* egg chambers, the mutant Me31B proteins  
393 show no obvious enrichment in the future oocytes (Figure 6B, second and third row),  
394 while Tral's enrichment pattern remain unaffected. In the *me31B<sup>FDF</sup>* mutants, the  
395 Me31B<sup>FDF</sup>-GFP proteins still showed enrichment in the oocytes, but it is much weaker  
396 than the Me31B<sup>WT</sup>-GFP control. We conclude that the Me31B N-ter motif, C-ter motif,  
397 and the FDF motif-binding motif are needed for the protein's proper accumulation into  
398 future oocytes at early-to-mid stages. For similar reasons discussed before, we suggest  
399 that Me31B's transport/accumulation into the oocytes depends on its RNA-interaction  
400 and protein-binding abilities. This speculation is in line with the observation that  
401 Me31B<sup>FDF</sup> proteins maintained a reduced enrichment in the oocytes: the protein's intact  
402 RNA-interacting motifs or other protein-binding motifs could have enabled an ineffective  
403 but functional transportation into the oocytes.

404 In the mid-stage egg chambers (Figure 6C), Me31B<sup>WT</sup> proteins were found along the  
405 cortex and localized to the germ plasm area of the oocytes (Figure 6C, first row), similar  
406 to the Me31B proteins in wildtype strains as previously reported [28]. In the *me31B<sup>N-ter</sup>*,  
407 *me31B<sup>C-ter</sup>*, *me31B<sup>FDF</sup>* mutants, the three mutant proteins localized to the above areas,

408 but the localized proteins appeared to have less granularity (Figure 6C, bottom three  
409 rows), consistent with the diffused status of the mutant proteins in earlier stages.

410 To further validate that the above localization phenotypes of the mutant Me31B proteins  
411 were not a result of defective germline RNP formation, we performed immunostaining  
412 against another germline RNP marker, Cup, a protein that complexes with both Me31B  
413 and Tral in germline RNPs such as nuage granules, P-body granules, and germplasm  
414 granules [28]. We found that, like Tral, Cup's aggregation and localization into those  
415 RNPs remain unchanged in the *me31B* mutants (data not shown).

## 416 **Summary**

417 All in all, this study took a mutagenesis approach to investigate the *in vivo* functions of  
418 six key motifs of DEAD-box RNA helicase Me31B, and the results are summarized in  
419 Figure 7. The three ATPase/helicase motifs (DEAD-box, DVLARAK, and HRIGR) are  
420 conserved among the members of the Me31B protein family, and mutations in each of  
421 them result in alleles (*me31B<sup>E208A</sup>*, *me31B<sup>DVLA AAA</sup>*, and *me31B<sup>R385Q</sup>*) that cause  
422 dominant female sterility. Their sterility exhibits oogenesis defects like nurse cell  
423 dumping defects or egg chamber degeneration and early embryogenesis arrest  
424 accompanied by embryo morphological abnormalities. In our attempt to find the  
425 molecular-level mechanism by which the ATPase/helicase motif mutations cause  
426 sterility, we analyzed the *me31B<sup>DVLA AAA</sup>* heterozygous mutant and showed that the  
427 mutation altered *nos* mRNA localization in the germ plasm and decreased *nos* and *osk*  
428 transcript levels, highlighting Me31B ATPase/helicase's function in maintaining germline  
429 mRNA localization and transcript level. Our additional analysis of Me31B's N-ter motif,  
430 C-ter motif, and FDF motif-binding motif demonstrated their impotence in fertility,

431 maintaining Me31B protein level and aggregation status, and subcellular localization.  
432 The results from this study provided insight on the molecular mechanisms of key  
433 functional motifs in *Drosophila* Me31B. Considering the conserved nature of Me31B and  
434 its homologs, these data aid in paving the road to understanding the functions and  
435 important regions of Me31B family proteins in various cell types and across different  
436 species.

437

## 438 **Materials and Methods**

### 439 **Fly strain generation by CRISPR gene editing**

440 Mutant *me31B* *Drosophila* strains were generated by using the previously reported  
441 CRISPR procedure [66, 67]. Specifically, CRISPR Optimal Target Finder [66] and  
442 DRSC/TRiP Functional Genomics Resources (Harvard Medical School) were used to  
443 find gRNA cutting sites flanking the *me31B* gene in the *Drosophila* genome. Then, the  
444 found gRNA sequences were cloned into gRNA-expressing plasmid vector pCFD5  
445 (Addgene) according to the suggested protocols. HDR donor plasmids carrying wild  
446 type *me31B* gene were constructed by cloning *me31B* gene DNA into pHD-sfGFP-  
447 ScarlessDsRed cloning vector (Addgene) according to suggested protocols. In the  
448 constructed HDR plasmids, the super-fold GFP (*sfGFP*) gene is positioned in-frame and  
449 downstream of the *me31B* gene so that the sfGFP protein is tagged to the C-terminal  
450 end of the expressed Me31B proteins. The *DsRed* marker gene is positioned in the  
451 intergenic region downstream of the *me31B* gene. HDR plasmid with mutant *me31B*  
452 genes was generated by mutating the *me31B* wild type gene in the wildtype HDR donor  
453 plasmid by using the Site-Directed Mutagenesis kit (New England Biolabs) according to

454 the manufacturer's recommended protocols. The resulting HDR plasmids containing  
455 different *me31B* alleles are named after the carried mutations (Figure 1). The gRNA-  
456 expressing plasmid and the HDR donor plasmids were co-injected into Cas9-expressing  
457 strain (Genetivision) to generate desired wild type and *mutant* *me31B* strains, which  
458 were crossed with a 2<sup>nd</sup> chromosome balancer to establish balanced stocks when  
459 possible. The plasmid vectors constructed and the obtained *me31B* strains were  
460 validated by sequencing.

#### 461 **Genetic crosses**

462 Balanced *me31B* wild type and mutant strains were self-crossed to obtain homozygous  
463 mutant strains. For the dominant female sterile *me31B* strains, males carrying the  
464 mutant allele were crossed with *w<sup>1118</sup>* (Bloomington Drosophila Stock Center 3605)  
465 females to obtain heterozygous strains.

#### 466 **Immunohistochemistry**

467 *Drosophila* ovary immunostaining was performed as previously described [24, 68, 69].  
468 The following antibody dilutions were used: Rabbit-anti-Tral (1:1,000). Donkey-anti-  
469 Rabbit-Cy3 secondary antibodies (Jackson ImmunoResearch) were used at 1:500.  
470 Images were captured by an Olympus FV3000 confocal laser scanning microscope.

#### 471 **Western blots**

472 Western blot antibodies were used at the following dilutions: rabbit-anti-GFP  
473 (1:100,000), and mouse-anti- $\alpha$ -Tubulin (1:100,000). Secondary antibodies were used at  
474 the following dilutions: mouse-anti-rabbit HRP (Jackson ImmunoResearch) (1:10,000 for  
475 rabbit-anti-GFP), goat-anti-mouse HRP (Santa Cruz Biotechnology) (1: 50,000 for

476 mouse-anti- $\alpha$ -Tubulin primary antibody). The protein band quantification analysis was  
477 performed by using ImageJ (<https://imagej.nih.gov/ij/>)

478 **Fertility assay (for *me31B<sup>WT</sup>*, *me31B<sup>N-ter</sup>*, *me31B<sup>C-ter</sup>*, and *me31B<sup>FDF</sup>* strains)**

479 Fertility assays were performed according to previously established protocols [60].  
480 Briefly, virgin females from *me31B<sup>WT</sup>*, *me31B<sup>N-ter</sup>*, *me31B<sup>C-ter</sup>*, and *me31B<sup>FDF</sup>* strains  
481 were collected and allowed to age for 3 – 4 days separately in fly food vials. Each  
482 female was then put in a vial in with a *w<sup>1118</sup>* male. After 24 hours, the males were  
483 removed from the vials, the fertilized females were transferred to a new vial every day  
484 for the next 10 days. The eggs laid and the progenies hatched from each vial were  
485 counted. The hatch rate of each vial is calculated by dividing the progenies hatched by  
486 the number of eggs laid. An equal amount (15 ml) of fly food medium (Molasses  
487 Formulation, Genesee Scientific) was used in each vial.

488 **Number of egg laying, embryo morphology, and embryo hatchability (*me31B<sup>E208A</sup>*,  
489 *me31B<sup>DVLA AAAA</sup>*, and *me31B<sup>R385Q</sup>* strains)**

490 To record the number of eggs laid from *me31B<sup>DVLA AAAA</sup>/+* strain, 40 females from the  
491 strain were put into a small embryo collection cage with grape-agar plates  
492 (Genetivision) in the presence of 10 *w<sup>1118</sup>* males. After letting the flies adjust for 24  
493 hours, the flies were given a fresh grape agar plate, and the eggs laid in the next 24  
494 hours were counted. Control experiments were conducted with *w<sup>1118</sup>* females, and six  
495 independent replicates were performed. To observe the morphology and the hatchability  
496 of the embryos from *me31B<sup>E208A</sup>/+*, *me31B<sup>DVLA AAAA</sup>/+*, *me31B<sup>R385Q</sup>/+*, and *w<sup>1118</sup>* control  
497 strains, approximately 80 females from each strain were put into a small embryo  
498 collection cage in the presence of 20 *w<sup>1118</sup>* males, and the embryos were collected on

499 grape agar plates at 25°C after 24 hours. The embryos were counted and analyzed  
500 under a dissection microscope for their morphology. The embryos' hatchability was  
501 calculated 72 hours after they were laid by counting the number of those that developed  
502 into larvae (or later stages) or by counting those that failed to develop and then  
503 subtracting the failed ones from the total number of eggs laid.

#### 504 **RNA extraction, cDNA synthesis, and quantitative RT-PCR**

505 Ovarian total RNA was extracted from 5 µl freshly dissected fly ovaries by using Qiagen  
506 RNeasy Purification Kit (Qiagen) according to the manufacturer's instructions. The  
507 obtained RNA samples' concentrations were measured by using NanoDrop 2000c. The  
508 RNAs were reversely transcribed to cDNAs by using the High-Capacity cDNA Reverse  
509 Transcription Kit (ThermoFisher) according to the manufacturer's instructions. The  
510 synthesized cDNAs were then used for quantitative PCR by using Luna Universal qPCR  
511 Master Mix (New England Biolabs). The following PCR Primers were used in this study:  
512 *nos* forward 5' GTCACCAGCAAACGGACGAGATT -3', *nos* reverse  
513 CGGAGCACTCCCGTAGGACAT, *osk* forward 5'- TTGCTGAGCCACGCCAGAA -3',  
514 *osk* reverse 5'- ACATTGGGAATGGTCAGCAGGAAATC -3', *rp49* forward 5'-  
515 GCTAAGCTGTCGCACAAA, *rp49* reverse 5'- TCCGGTGGGCAGCATGTG -3'. *rp49*  
516 RNA was used as the reference. Data analysis was conducted by using the CFX  
517 Manager Software (BioRad) and Microsoft Excel.

#### 518 **smFISH, image analysis, and computational modeling**

519 smFISH was carried out as previously described using published *nos* probe sequences  
520 [57, 58, 70]. In summary, ovaries were dissected from yeast-fed females in cold PBS in  
521 under 10 minutes and tissues were fixed for 30 minutes in 4% paraformaldehyde and

522 PBS solution. Tissue was incubated with smFISH probes overnight at 37 °C in the  
523 hybridization solution previously described [57]. For imaging, egg chambers were  
524 mounted in Prolong Glass (Life Technologies) and were allowed to cure for 72 hours at  
525 room temperature [57, 58]. A Leica STELLARIS 5 confocal microscope was used for  
526 imaging *nos* smFISH experiments that are describe in detail [58]. The identification and  
527 quantification of unlocalized single *nos* transcripts and localized *nos* homotypic clusters  
528 were carried out using a custom MATLAB (Mathworks) program that has been  
529 previously described and published [57, 58]. Confocal images shown in Figure 3 are  
530 maximum projections that were filtered by a balanced circular difference-of-Gaussian  
531 with a center radius size of 1.2 pixels and surround size of 2.2 pixels as previously done  
532 for other germ plasm studies [56, 58]. The total number of homotypic clusters identified  
533 are reported in the figure legends. For modeling experiments, we employed a previously  
534 published model that simulates the formation of germ granules, including *nos* homotypic  
535 clusters [58]. The only modeling parameters that were adjusted were 1) carrying  
536 capacity, which is regulated by Osk levels, was set from 1 (wild type) to 0.56, and 2) the  
537 pool of *nos* transcript expression was set from 1 (wild type) to 0.61 to mimic the RT-  
538 PCR levels reported in our results section [58].

### 539 **Statistical Analysis**

540 Reported p-values between average *nos* homotypic cluster sizes were performed using  
541 ANOVA test with a post-hoc Tukey test that was calculated using R statistical  
542 programming and R Studio using the function aov and TukeyHSD functions [71, 72].  
543 Violin plots were created using the ggplot and ggstatsplot packages [73, 74].

### 544 **Acknowledgments**



545 We thank the members of the Gao Lab for discussing and revising this manuscript. We  
546 thank Dr. Olivia Rissland and Dr. Akira Nakamura for their kind gifts of antibodies. We  
547 thank the Center for Biological Imaging at Kean University for assisting with image  
548 acquisition and the members and the Niepielko Lab for their helpful comments and  
549 fruitful discussions. Research reported in this publication was supported by the Eunice  
550 Kennedy Shriver National Institute of Child Health & Human Development of the  
551 National Institutes of Health under award no. R15HD102960 to MGN and  
552 1R15HD092925-01A1 to MG.

### 553 **Author Contributions**

554 MG conceived and directed the project. MG and MGN wrote the manuscript with input  
555 from all authors. EK, MP, IF, and NM performed the fertility assays. AM, CD, and JE  
556 generated the CRISPR strains. MGN, DAD, and BMO performed the microscopic  
557 analysis, smFISH experiments, and modeling. KS and YM performed the confocal  
558 microscopy experiments. BP, ARM, and DG performed the Western blots and data  
559 analysis. All authors discussed the results and commented on the manuscript.

### 560 **Competing Interests**

561 The authors declare no competing interests.

### 562 **Data Availability**

563 All the data presented in this study are included in this manuscript or its  
564 supplementary information.

### 565 **References**

- 566 1. Nakamura, A., Amikura, R., Hanyu, K. & Kobayashi, S. (2001) Me31B silences  
567 translation of oocyte-localizing RNAs through the formation of cytoplasmic RNP  
568 complex during *Drosophila* oogenesis, *Development*. **128**, 3233-42.
- 569 2. Wang, M., Ly, M., Lugowski, A., Laver, J. D., Lipshitz, H. D., Smibert, C. A. &  
570 Rissland, O. S. (2017) ME31B globally represses maternal mRNAs by two distinct  
571 mechanisms during the *Drosophila* maternal-to-zygotic transition, *Elife*. **6**.
- 572 3. Gotze, M., Dufourt, J., Ihling, C., Rammelt, C., Pierson, S., Sambrani, N., Temme,  
573 C., Sinz, A., Simonelig, M. & Wahle, E. (2017) Translational repression of the  
574 *Drosophila* nanos mRNA involves the RNA helicase Belle and RNA coating by Me31B  
575 and Trailer hitch, *RNA*.
- 576 4. Kugler, J. M., Chicoine, J. & Lasko, P. (2009) Bicaudal-C associates with a Trailer  
577 Hitch/Me31B complex and is required for efficient Gurken secretion, *Dev Biol*. **328**, 160-  
578 72.
- 579 5. Liu, L., Qi, H., Wang, J. & Lin, H. (2011) PAPI, a novel TUDOR-domain protein,  
580 complexes with AGO3, ME31B and TRAL in the nuage to silence transposition,  
581 *Development*. **138**, 1863-73.
- 582 6. Langerak, S., Trombley, A., Patterson, J. R., Leroux, D., Couch, A., Wood, M. P. &  
583 Schisa, J. A. (2019) Remodeling of the endoplasmic reticulum in *Caenorhabditis*  
584 *elegans* oocytes is regulated by CGH-1, *Genesis*. **57**, e23267.
- 585 7. Ko, S., Kawasaki, I. & Shim, Y. H. (2013) PAB-1, a *Caenorhabditis elegans* poly(A)-  
586 binding protein, regulates mRNA metabolism in germline by interacting with CGH-1 and  
587 CAR-1, *PLoS One*. **8**, e84798.

- 588 8. Kashima, M., Kumagai, N., Agata, K. & Shibata, N. (2016) Heterogeneity of  
589 chromatoid bodies in adult pluripotent stem cells of planarian *Dugesia japonica*, *Dev*  
590 *Growth Differ.* **58**, 225-37.
- 591 9. Yoshida-Kashikawa, M., Shibata, N., Takechi, K. & Agata, K. (2007) DjCBC-1, a  
592 conserved DEAD box RNA helicase of the RCK/p54/Me31B family, is a component of  
593 RNA-protein complexes in planarian stem cells and neurons, *Dev Dyn.* **236**, 3436-50.
- 594 10. Alves-Rodrigues, I., Mas, A. & Diez, J. (2007) *Xenopus* Xp54 and human RCK/p54  
595 helicases functionally replace yeast Dhh1p in brome mosaic virus RNA replication, *J*  
596 *Viro.* **81**, 4378-80.
- 597 11. Smillie, D. A. & Sommerville, J. (2002) RNA helicase p54 (DDX6) is a shuttling  
598 protein involved in nuclear assembly of stored mRNP particles, *J Cell Sci.* **115**, 395-407.
- 599 12. Aravin, A. A., van der Heijden, G. W., Castaneda, J., Vagin, V. V., Hannon, G. J. &  
600 Bortvin, A. (2009) Cytoplasmic compartmentalization of the fetal piRNA pathway in  
601 mice, *PLoS Genet.* **5**, e1000764.
- 602 13. Swetloff, A., Conne, B., Huarte, J., Pitetti, J. L., Nef, S. & Vassalli, J. D. (2009)  
603 Dcp1-bodies in mouse oocytes, *Mol Biol Cell.* **20**, 4951-61.
- 604 14. Lin, F., Wang, R., Shen, J. J., Wang, X., Gao, P., Dong, K. & Zhang, H. Z. (2008)  
605 Knockdown of RCK/p54 expression by RNAi inhibits proliferation of human colorectal  
606 cancer cells in vitro and in vivo, *Cancer Biol Ther.* **7**, 1669-76.
- 607 15. Marcon, B. H., Rebelatto, C. K., Cofre, A. R., Dallagiovanna, B. & Correa, A. (2020)  
608 DDX6 Helicase Behavior and Protein Partners in Human Adipose Tissue-Derived Stem  
609 Cells during Early Adipogenesis and Osteogenesis, *Int J Mol Sci.* **21**.

- 610 16. Wang, Y., Arribas-Layton, M., Chen, Y., Lykke-Andersen, J. & Sen, G. L. (2015)  
611 DDX6 Orchestrates Mammalian Progenitor Function through the mRNA Degradation  
612 and Translation Pathways, *Mol Cell*. **60**, 118-30.
- 613 17. Hansen, M., Zeddies, S., Meinders, M., di Summa, F., van Alphen, F. P. J.,  
614 Hoogendijk, A. J., Moore, K. S., Halbach, M., Gutierrez, L., van den Biggelaar, M.,  
615 Thijssen-Timmer, D. C., Auburger, G. W. J., van den Akker, E., von Lindern, M. &  
616 Rollmann, E. (2020) The RNA-Binding Protein ATXN2 is Expressed during  
617 Megakaryopoiesis and May Control Timing of Gene Expression, *Int J Mol Sci*. **21**.
- 618 18. Di Stefano, B., Luo, E. C., Haggerty, C., Aigner, S., Charlton, J., Brumbaugh, J., Ji,  
619 F., Rabano Jimenez, I., Clowers, K. J., Huebner, A. J., Clement, K., Lipchina, I., de Kort,  
620 M. A. C., Anselmo, A., Pulice, J., Gerli, M. F. M., Gu, H., Gygi, S. P., Sadreyev, R. I.,  
621 Meissner, A., Yeo, G. W. & Hochedlinger, K. (2019) The RNA Helicase DDX6 Controls  
622 Cellular Plasticity by Modulating P-Body Homeostasis, *Cell Stem Cell*. **25**, 622-638 e13.
- 623 19. Weston, A. & Sommerville, J. (2006) Xp54 and related (DDX6-like) RNA helicases:  
624 roles in messenger RNP assembly, translation regulation and RNA degradation, *Nucleic*  
625 *Acids Res*. **34**, 3082-94.
- 626 20. Chu, C. Y. & Rana, T. M. (2006) Translation repression in human cells by  
627 microRNA-induced gene silencing requires RCK/p54, *PLoS Biol*. **4**, e210.
- 628 21. Barckmann, B., Pierson, S., Dufourt, J., Papin, C., Armenise, C., Port, F.,  
629 Grentzinger, T., Chambeyron, S., Baronian, G., Desvignes, J. P., Curk, T. & Simonelig,  
630 M. (2015) Aubergine iCLIP Reveals piRNA-Dependent Decay of mRNAs Involved in  
631 Germ Cell Development in the Early Embryo, *Cell Rep*. **12**, 1205-16.

- 632 22. Jeske, M., Moritz, B., Anders, A. & Wahle, E. (2011) Smaug assembles an ATP-  
633 dependent stable complex repressing nanos mRNA translation at multiple levels, *EMBO*  
634 *J.* **30**, 90-103.
- 635 23. Sudhakaran, I. P., Hillebrand, J., Dervan, A., Das, S., Holohan, E. E., Hulsmeier, J.,  
636 Sarov, M., Parker, R., VijayRaghavan, K. & Ramaswami, M. (2014) FMRP and Ataxin-2  
637 function together in long-term olfactory habituation and neuronal translational control,  
638 *Proc Natl Acad Sci U S A.* **111**, E99-E108.
- 639 24. DeHaan, H., McCambridge, A., Armstrong, B., Cruse, C., Solanki, D., Trinidad, J.  
640 C., Arkov, A. L. & Gao, M. (2017) An in vivo Proteomic Analysis of the Me31B  
641 Interactome in Drosophila Germ Granules, *FEBS Lett.*
- 642 25. Arkov, A. L. & Ramos, A. (2010) Building RNA-protein granules: insight from the  
643 germline, *Trends Cell Biol.* **20**, 482-90.
- 644 26. Voronina, E., Seydoux, G., Sassone-Corsi, P. & Nagamori, I. (2011) RNA granules  
645 in germ cells, *Cold Spring Harb Perspect Biol.* **3**.
- 646 27. Rangan, P., DeGennaro, M., Jaime-Bustamante, K., Coux, R. X., Martinho, R. G. &  
647 Lehmann, R. (2009) Temporal and spatial control of germ-plasm RNAs, *Curr Biol.* **19**,  
648 72-7.
- 649 28. McCambridge, A., Solanki, D., Olchawa, N., Govani, N., Trinidad, J. C. & Gao, M.  
650 (2020) Comparative Proteomics Reveal Me31B's Interactome Dynamics, Expression  
651 Regulation, and Assembly Mechanism into Germ Granules during Drosophila Germline  
652 Development, *Sci Rep.* **10**, 564.
- 653 29. Sankaranarayanan, M., Emenecker, R. J., Jahnel, M., Trussina, I. R. E. A.,  
654 Wayland, M., Alberti, S., Holehouse, A. S. & Weil, T. T. (2021) The arrested state of

- 655 processing bodies supports mRNA regulation in early development, *bioRxiv*,  
656 2021.03.16.435709.
- 657 30. Minshall, N., Kress, M., Weil, D. & Standart, N. (2009) Role of p54 RNA helicase  
658 activity and its C-terminal domain in translational repression, P-body localization and  
659 assembly, *Mol Biol Cell*. **20**, 2464-72.
- 660 31. Barbee, S. A., Estes, P. S., Cziko, A. M., Hillebrand, J., Luedeman, R. A., Coller, J.  
661 M., Johnson, N., Howlett, I. C., Geng, C., Ueda, R., Brand, A. H., Newbury, S. F.,  
662 Wilhelm, J. E., Levine, R. B., Nakamura, A., Parker, R. & Ramaswami, M. (2006)  
663 Staufen- and FMRP-containing neuronal RNPs are structurally and functionally related  
664 to somatic P bodies, *Neuron*. **52**, 997-1009.
- 665 32. Minshall, N., Thom, G. & Standart, N. (2001) A conserved role of a DEAD box  
666 helicase in mRNA masking, *RNA*. **7**, 1728-42.
- 667 33. Tritschler, F., Eulalio, A., Helms, S., Schmidt, S., Coles, M., Weichenrieder, O.,  
668 Izaurralde, E. & Truffault, V. (2008) Similar modes of interaction enable Trailer Hitch  
669 and EDC3 to associate with DCP1 and Me31B in distinct protein complexes, *Mol Cell*  
670 *Biol*. **28**, 6695-708.
- 671 34. Tritschler, F., Braun, J. E., Eulalio, A., Truffault, V., Izaurralde, E. & Weichenrieder,  
672 O. (2009) Structural basis for the mutually exclusive anchoring of P body components  
673 EDC3 and Tral to the DEAD box protein DDX6/Me31B, *Mol Cell*. **33**, 661-8.
- 674 35. Peter, D., Ruscica, V., Bawankar, P., Weber, R., Helms, S., Valkov, E., Igreja, C. &  
675 Izaurralde, E. (2019) Molecular basis for GIGYF-Me31B complex assembly in 4EHP-  
676 mediated translational repression, *Genes Dev*. **33**, 1355-1360.

- 677 36. Hara, M., Lourido, S., Petrova, B., Lou, H. J., Von Stetina, J. R., Kashevsky, H.,  
678 Turk, B. E. & Orr-Weaver, T. L. (2018) Identification of PNG kinase substrates uncovers  
679 interactions with the translational repressor TRAL in the oocyte-to-embryo transition,  
680 *Elife*. **7**.
- 681 37. Cheng, Z., Collier, J., Parker, R. & Song, H. (2005) Crystal structure and functional  
682 analysis of DEAD-box protein Dhh1p, *RNA*. **11**, 1258-70.
- 683 38. Intile, P. J., Balzer, G. J., Wolfgang, M. C. & Yahr, T. L. (2015) The RNA Helicase  
684 DeaD Stimulates ExsA Translation To Promote Expression of the Pseudomonas  
685 aeruginosa Type III Secretion System, *J Bacteriol*. **197**, 2664-74.
- 686 39. Liao, S. E., Kandasamy, S. K., Zhu, L. & Fukunaga, R. (2019) DEAD-box RNA  
687 helicase Belle posttranscriptionally promotes gene expression in an ATPase activity-  
688 dependent manner, *RNA*. **25**, 825-839.
- 689 40. Mugler, C. F., Hondele, M., Heinrich, S., Sachdev, R., Vallotton, P., Koek, A. Y.,  
690 Chan, L. Y. & Weis, K. (2016) ATPase activity of the DEAD-box protein Dhh1 controls  
691 processing body formation, *Elife*. **5**.
- 692 41. Story, R. M., Li, H. & Abelson, J. N. (2001) Crystal structure of a DEAD box protein  
693 from the hyperthermophile Methanococcus jannaschii, *Proc Natl Acad Sci U S A*. **98**,  
694 1465-70.
- 695 42. Buszczak, M. & Cooley, L. (2000) Eggs to die for: cell death during Drosophila  
696 oogenesis, *Cell Death Differ*. **7**, 1071-4.
- 697 43. McCall, K. & Steller, H. (1998) Requirement for DCP-1 caspase during Drosophila  
698 oogenesis, *Science*. **279**, 230-4.

- 699 44. Shen, R., Weng, C., Yu, J. & Xie, T. (2009) eIF4A controls germline stem cell self-  
700 renewal by directly inhibiting BAM function in the Drosophila ovary, *Proc Natl Acad Sci*  
701 *U S A.* **106**, 11623-8.
- 702 45. Oberer, M., Marintchev, A. & Wagner, G. (2005) Structural basis for the  
703 enhancement of eIF4A helicase activity by eIF4G, *Genes Dev.* **19**, 2212-23.
- 704 46. Pause, A., Methot, N. & Sonenberg, N. (1993) The HRIGRXXR region of the DEAD  
705 box RNA helicase eukaryotic translation initiation factor 4A is required for RNA binding  
706 and ATP hydrolysis, *Mol Cell Biol.* **13**, 6789-98.
- 707 47. Pause, A. & Sonenberg, N. (1992) Mutational analysis of a DEAD box RNA  
708 helicase: the mammalian translation initiation factor eIF-4A, *EMBO J.* **11**, 2643-54.
- 709 48. Pause, A., Methot, N., Svitkin, Y., Merrick, W. C. & Sonenberg, N. (1994) Dominant  
710 negative mutants of mammalian translation initiation factor eIF-4A define a critical role  
711 for eIF-4F in cap-dependent and cap-independent initiation of translation, *EMBO J.* **13**,  
712 1205-15.
- 713 49. Chen, W., Hu, Y., Lang, C. F., Brown, J. S., Schwabach, S., Song, X., Zhang, Y.,  
714 Munro, E., Bennett, K., Zhang, D. & Lee, H. C. (2020) The Dynamics of P Granule  
715 Liquid Droplets Are Regulated by the *Caenorhabditis elegans* Germline RNA Helicase  
716 GLH-1 via Its ATP Hydrolysis Cycle, *Genetics.* **215**, 421-434.
- 717 50. Marnik, E. A., Fuqua, J. H., Sharp, C. S., Rochester, J. D., Xu, E. L., Holbrook, S.  
718 E. & Updike, D. L. (2019) Germline Maintenance Through the Multifaceted Activities of  
719 GLH/Vasa in *Caenorhabditis elegans* P Granules, *Genetics.* **213**, 923-939.
- 720 51. Lehmann, R. (2016) Germ Plasm Biogenesis--An Oskar-Centric Perspective, *Curr*  
721 *Top Dev Biol.* **116**, 679-707.



- 722 52. Gao, M. & Arkov, A. L. (2013) Next generation organelles: structure and role of  
723 germ granules in the germline, *Mol Reprod Dev.* **80**, 610-23.
- 724 53. Jamieson-Lucy, A. & Mullins, M. C. (2019) The vertebrate Balbiani body, germ  
725 plasm, and oocyte polarity, *Curr Top Dev Biol.* **135**, 1-34.
- 726 54. Bilinski, S. M., Jaglarz, M. K. & Tworzydło, W. (2017) The Pole (Germ) Plasm in  
727 Insect Oocytes, *Results Probl Cell Differ.* **63**, 103-126.
- 728 55. Wang, J. T. & Seydoux, G. (2013) Germ cell specification, *Adv Exp Med Biol.* **757**,  
729 17-39.
- 730 56. Little, S. C., Sinsimer, K. S., Lee, J. J., Wieschaus, E. F. & Gavis, E. R. (2015)  
731 Independent and coordinate trafficking of single *Drosophila* germ plasm mRNAs, *Nat*  
732 *Cell Biol.* **17**, 558-68.
- 733 57. Niepielko, M. G., Eagle, W. V. I. & Gavis, E. R. (2018) Stochastic Seeding Coupled  
734 with mRNA Self-Recruitment Generates Heterogeneous *Drosophila* Germ Granules,  
735 *Curr Biol.* **28**, 1872-1881 e3.
- 736 58. Valentino, M., Ortega, B. M., Ulrich, B., Doyle, D. A., Farnum, E. D., Joiner, D. A.,  
737 Gavis, E. R. & Niepielko, M. G. (2022) Computational modeling offers new insight into  
738 *Drosophila* germ granule development, *Biophys J.* **121**, 1465-1482.
- 739 59. Huang, J. H., Ku, W. C., Chen, Y. C., Chang, Y. L. & Chu, C. Y. (2017) Dual  
740 mechanisms regulate the nucleocytoplasmic localization of human DDX6, *Sci Rep.* **7**,  
741 42853.
- 742 60. Mossman, J. A., Mabeza, R. M. S., Blake, E., Mehta, N. & Rand, D. M. (2019) Age  
743 of Both Parents Influences Reproduction and Egg Dumping Behavior in *Drosophila*  
744 *melanogaster*, *J Hered.* **110**, 300-309.

- 745 61. Tritschler, F., Eulalio, A., Truffault, V., Hartmann, M. D., Helms, S., Schmidt, S.,  
746 Coles, M., Izaurralde, E. & Weichenrieder, O. (2007) A divergent Sm fold in EDC3  
747 proteins mediates DCP1 binding and P-body targeting, *Mol Cell Biol.* **27**, 8600-11.
- 748 62. Sankaranarayanan, M., Emenecker, R. J., Wilby, E. L., Jahnel, M., Trussina, I.,  
749 Wayland, M., Alberti, S., Holehouse, A. S. & Weil, T. T. (2021) Adaptable P body  
750 physical states differentially regulate bicoid mRNA storage during early Drosophila  
751 development, *Dev Cell.* **56**, 2886-2901 e6.
- 752 63. Nguyen Ba, A. N., Pogoutse, A., Provar, N. & Moses, A. M. (2009) NLStradamus:  
753 a simple Hidden Markov Model for nuclear localization signal prediction, *BMC*  
754 *Bioinformatics.* **10**, 202.
- 755 64. Kosugi, S., Hasebe, M., Tomita, M. & Yanagawa, H. (2009) Systematic  
756 identification of cell cycle-dependent yeast nucleocytoplasmic shuttling proteins by  
757 prediction of composite motifs, *Proc Natl Acad Sci U S A.* **106**, 10171-6.
- 758 65. Lin, J. R. & Hu, J. (2013) SeqNLS: nuclear localization signal prediction based on  
759 frequent pattern mining and linear motif scoring, *PLoS One.* **8**, e76864.
- 760 66. Gratz, S. J., Ukken, F. P., Rubinstein, C. D., Thiede, G., Donohue, L. K.,  
761 Cummings, A. M. & O'Connor-Giles, K. M. (2014) Highly specific and efficient  
762 CRISPR/Cas9-catalyzed homology-directed repair in Drosophila, *Genetics.* **196**, 961-  
763 71.
- 764 67. Gratz, S. J., Rubinstein, C. D., Harrison, M. M., Wildonger, J. & O'Connor-Giles, K.  
765 M. (2015) CRISPR-Cas9 Genome Editing in Drosophila, *Curr Protoc Mol Biol.* **111**, 31 2  
766 1-20.

- 767 68. Creed, T. M., Loganathan, S. N., Varonin, D., Jackson, C. A. & Arkov, A. L. (2010)  
768 Novel role of specific Tudor domains in Tudor-Aubergine protein complex assembly and  
769 distribution during *Drosophila* oogenesis, *Biochem Biophys Res Commun.* **402**, 384-9.
- 770 69. Arkov, A. L., Wang, J. Y., Ramos, A. & Lehmann, R. (2006) The role of Tudor  
771 domains in germline development and polar granule architecture, *Development.* **133**,  
772 4053-62.
- 773 70. Eagle, W. V. I., Yeboah-Kordieh, D. K., Niepielko, M. G. & Gavis, E. R. (2018)  
774 Distinct cis-acting elements mediate targeting and clustering of *Drosophila* polar granule  
775 mRNAs, *Development.* **145**.
- 776 71. Team, R. (2020) RStudio: Integrated Development Environment for R in, RStudio,  
777 PBC., Boston, MA.
- 778 72. Team, R. C. (2020) R: A Language and Environment for Statistical Computing in, R  
779 Foundation for Statistical Computing,
- 780 73. Wickham, H. (2016) *ggplot2: Elegant Graphics for Data Analysis*, pringer-Verlag  
781 New York.
- 782 74. Patil, I. (2021) Visualizations with statistical details: The ggstatsplot approach,  
783 *Journal of Open Source Software.* **6**, 3167.

784

## 785 **Figure Legends**

786 **Figure 1. Diagram of the Me31B wildtype and mutant proteins in the *Drosophila***  
787 **strains generated in this study.** The bar shape after each Me31B protein name  
788 represents the primary structure of the protein. The numbers on top of the bars mark the  
789 number of amino acids and their positions in the protein. Green Fluorescence Protein  
790 (GFP) tags are expressed at the C-terminal end of the constructed Me31B proteins. The  
791 point mutations are as follows: E208A, glutamic acid 208 replaced by alanine; R101A,  
792 arginine 101 replaced by alanine; K103A, lysine 103 replaced by alanine; R385Q,  
793 arginine 385 replaced by glutamine; C285A, cysteine 285 replaced by alanine; L289A,  
794 leucine 289 replaced by alanine; Y273S, tyrosine 273 replaced by serine; Y274N,  
795 tyrosine 274 replaced by asparagine. Me31B<sup>N-ter</sup> protein (deletion of amino acids 277 to  
796 459) contains the first 276 amino acids of the wildtype protein. Me31B<sup>C-ter</sup> protein  
797 (deletion of amino acids 1 to 276) contains the last 183 amino acids of the wildtype  
798 protein.

799 \*Note that two unintended, mis-sense mutations were detected in the *me31B*<sup>FDF</sup> strain  
800 when sequencing its *me31B* gene. The two mutations (Y273S and Y274N) are outside  
801 the FDF motif-binding motif.

802 **Figure 2. Defective embryogenesis and oogenesis of heterozygous *me31B*<sup>E208A</sup>,**  
803 ***me31B*<sup>DVLA AAAA</sup>, and *me31B*<sup>R385Q</sup> strains. (A)** Embryos laid by *w*<sup>1118</sup> control females all  
804 had normal (100%) dorsal appendages. In contrast, embryos laid by *me31B*<sup>E208A/+</sup>  
805 females had fused (45%), shortened (33%), and normal (22%, not shown) dorsal  
806 appendages; embryos laid by *me31B*<sup>DVLA AAAA/+</sup> females had shortened (33%) or normal  
807 (67%, not shown) dorsal appendages; embryos laid by *me31B*<sup>R385Q/+</sup> females all had

808 severe morphological defects (100%). **(B)** In 52% of late-stage (stage 14) eggs of  
809 *me31B<sup>E208A</sup>/+* mutant (right panel), dumping of the nurse cell content into the oocyte  
810 was incomplete (see highlighted region with yellow dashed lines), in contrast to the  
811 complete dumping of *w<sup>1118</sup>* control eggs (left panel). DAPI staining of the same eggs  
812 was shown at the bottom panels, and nurse cell nuclei-like materials were present in the  
813 “un-dumped” region of the *me31B<sup>E208A</sup>/+* mutant egg. **(C)** Similar dumpless phenotypes  
814 were observed in 78% of *me31B<sup>DVLA AAAA</sup>/+* mutant’s late-stage (stage 14) eggs. The “un-  
815 dumped” regions (highlighted with yellow dashed lines) were broader than the  
816 *me31B<sup>E208A</sup>/+* mutant from (B). Only 22% of *me31B<sup>DVLA AAAA</sup>/+* mutant’s eggs appeared  
817 normal. **(D)** Ovarioles from *w<sup>1118</sup>* and *me31B<sup>R385Q</sup>/+* females were stained by DAPI stain.  
818 The ovarioles are oriented so that the early-stage egg chambers are on the left and the  
819 later-stage egg chambers are on the right. Early-to-mid stage egg chamber  
820 degenerations in *me31B<sup>R385Q</sup>/+* mutant (right panel) are indicated by arrows, in contrast  
821 to the successfully developed early- and mid-stage egg chambers in the *w<sup>1118</sup>* control  
822 (left panel).

823 **Figure 3. smFISH analysis of *nos* mRNA in *me31B<sup>DVLA AAAA</sup>* heterozygous mutant**  
824 **and quantitative RT-PCR analysis of *nos* and *osk* mRNA levels in heterozygous**  
825 ***me31B<sup>E208A</sup>*, *me31B<sup>DVLA AAAA</sup>*, and *me31B<sup>R385Q</sup>* mutants. **(A)** Stage 13 oocytes from  
826 *me31B<sup>WT</sup>* and *me31B<sup>DVLA AAAA</sup>* flies, with *nos* (magenta) mRNAs detected using smFISH.  
827 The white solid box indicates the unlocalized single transcripts of *nos* that are found in  
828 the bulk cytoplasm (enlarged in the second panel) while the broken yellow box  
829 highlights *nos* that has localized to the germ plasm by forming homotypic clusters  
830 (enlarged and shown as a heatmap in the third panel). **(B)** The distribution of *nos* cluster**

831 size (number of *nos* transcripts calculated within a granule) found in each genotype's  
832 germ plasm and the computational model. Total clusters identified and analyzed include  
833 3,295 from *me31B<sup>DVLA AAA</sup>*, 5,551 from the computational model, 19,195 *me31B<sup>WT</sup>*, and  
834 19,147 from *yellow white* (*yw*). Of note, only oocytes that did not display a dumpless  
835 phenotype were included in this analysis. **(C)** In *me31B<sup>DVLA AAA</sup>/+* ovaries, *nos* transcript  
836 level is 61% ± 7% of that in the *w<sup>1118</sup>* control ( $p < 0.05$ ) and *osk* transcript level is 56% ±  
837 4% of that in the control ( $p < 0.05$ ). **(D)** In *me31B<sup>E208A</sup>/+* ovaries, *nos* transcript level is  
838 104% ± 7% of that in the *w<sup>1118</sup>* control (NS) and *osk* transcript level is 162% ± 12% of  
839 that in the control (NS,  $p = 0.054$ ). **(E)** In *me31B<sup>R285Q</sup>/+* ovaries, *nos* transcript level is  
840 44% ± 2% of that in the *w<sup>1118</sup>* control ( $p < 0.001$ ) and *osk* transcript level is 194% ± 12%  
841 of that in the control ( $p < 0.001$ ). NS, not significant. Error bar represents standard error  
842 of the mean.

843 **Figure 4. Fertility assays of *me31B<sup>N-ter</sup>*, *me31B<sup>C-ter</sup>*, *me31B<sup>FDF</sup>* mutants. **(A)** A  
844 *me31B<sup>WT</sup>* (control), *me31B<sup>N-ter</sup>*, *me31B<sup>C-ter</sup>*, and *me31B<sup>FDF</sup>* female fly laid an average of  
845 117, 68, 29, and 77 eggs, respectively. The egg number of *me31B<sup>N-ter</sup>*, *me31B<sup>C-ter</sup>*, and  
846 *me31B<sup>FDF</sup>* mutants are 58% ( $p < 0.01$ ), 25% ( $p < 0.001$ ), and 66% ( $p < 0.05$ ) of the  
847 *me31B<sup>WT</sup>* (control), respectively. **(B)** A *me31B<sup>WT</sup>* (control), *me31B<sup>N-ter</sup>*, *me31B<sup>C-ter</sup>*, and  
848 *me31B<sup>FDF</sup>* female fly produced an average of 106, 47, 0, and 75 progenies, respectively.  
849 The progeny number of *me31B<sup>N-ter</sup>*, *me31B<sup>C-ter</sup>* and *me31B<sup>FDF</sup>* mutants are 44% ( $p <$   
850 0.001), 0% ( $p < 0.0001$ ), and 71% (NS) respectively. NS, not significant. **(C)** The  
851 average egg hatch rates for *me31B<sup>WT</sup>* (control), *me31B<sup>N-ter</sup>*, *me31B<sup>C-ter</sup>*, and *me31B<sup>FDF</sup>*  
852 strains are 90.8%, 68.3%, 0%, and 97.1%, respectively. Compared to *me31B<sup>WT</sup>*, the  
853 hatch rate decreases in *me31B<sup>N-ter</sup>* and *me31B<sup>C-ter</sup>* mutants are statistically significant**

854 but not significant in *me31B<sup>FDF</sup>*. **(D)** Embryos laid by *me31B<sup>C-ter</sup>* flies had fused dorsal  
855 appendages (68%) or missing dorsal appendages (32%), in contrast to the normal  
856 dorsal appendages (100%) in *me31B<sup>WT</sup>* (control). Error bar represents standard error of  
857 the mean.

858 **Figure 5. Western blot quantification of Me31B protein level in *me31B<sup>N-ter</sup>*,**  
859 ***me31B<sup>C-ter</sup>*, *me31B<sup>FDF</sup>* mutants. **(A)** Anti-GFP Western blots were used to quantify the  
860 Me31B<sup>WT</sup>-GFP, Me31B<sup>N-ter</sup>-GFP, Me31B<sup>C-ter</sup>-GFP, and Me31B<sup>FDF</sup>-GFP proteins in the  
861 ovaries of the corresponding fly strains. Anti-Tubulin Western blots were used as  
862 loading controls. The expression level of Me31B<sup>N-ter</sup> and Me31B<sup>C-ter</sup> proteins were  
863 conspicuously lower than the Me31B<sup>WT</sup> control protein, while the Me31B<sup>FDF</sup> protein level  
864 is comparable to the control. The images shown are representative images of multiple  
865 biological replicates. The additional, uncropped biological replicate images are  
866 presented in Supplementary Figure 2. **(B)** The Me31B<sup>N-ter</sup>-GFP and Me31B<sup>C-ter</sup>-GFP  
867 protein levels are 40% ( $p < 0.01$ ) and 11% ( $p < 0.001$ ) relative to the Me31B<sup>WT</sup>-GFP  
868 control protein, respectively. Me31B<sup>FDF</sup>-GFP protein level is 114% relative to the control  
869 (NS). Western blot image analysis was performed with ImageJ and protein  
870 quantifications were normalized by using the alpha-tubulin proteins. NS, not statistically  
871 significant. Error bar represents standard error of the mean.**

872 **Figure 6. Mutant Me31B proteins in *me31B<sup>N-ter</sup>*, *me31B<sup>C-ter</sup>*, *me31B<sup>FDF</sup>* strain show**  
873 **altered aggregation and localization in developing egg chambers. **(A)**** In early-  
874 stage egg chambers, mutant Me31B-GFP proteins (green channel) in *me31B<sup>N-ter</sup>*,  
875 *me31B<sup>C-ter</sup>*, and *me31B<sup>FDF</sup>* strains are much more diffused in the nurse cell and oocytes,  
876 in contrast to the aggregated status of Me31B<sup>WT</sup> in RNP granules like nuage granules

877 and P-bodies. And none of the three mutant proteins overlap with partner protein Tral.  
878 Unlike Me31B mutant proteins, Tral (Red channel) localization are not affected in the  
879 three mutants. Particularly, Me31B<sup>N-ter</sup>-GFP proteins are present in the nuclei of nurse  
880 cells. Me31B<sup>C-ter</sup>-GFP proteins form fewer numbers and smaller size granules than  
881 Me31B<sup>WT</sup>-GFP, and the Me31B<sup>C-ter</sup> granules do not associate with Tral-marked  
882 granules. Nurse cell perinuclear regions (nuage) are indicated by arrowheads. P-body  
883 granules marked by Tral are indicated by arrows. Note that Me31B<sup>C-ter</sup>-GFP and  
884 Me31B<sup>FDF</sup>-GFP proteins were found in ring-like structures that appear to be ring canals  
885 (yellow dashed squares, same for B and C), structures that connect the cytoplasm  
886 between nurse cells and oocytes and allow for intracellular transportations. **(B)** In early-  
887 to-mid stage egg chambers, mutant Me31B-GFP proteins (green channel) in *me31B<sup>N-ter</sup>*  
888 and *me31B<sup>C-ter</sup>* strains do not enrich in the developing oocytes like that in the *me31B<sup>WT</sup>*  
889 control. Me31B<sup>FDF</sup>-GFP protein's enrichment in the developing oocytes is weaker than  
890 that in the control. Tral (red channel)'s enrichment in the oocytes is not affected in the  
891 three mutants. Developing oocytes are indicated by arrowheads. **(C)** In mid-stage egg  
892 chambers, mutant Me31B-GFP proteins of *me31B<sup>N-ter</sup>*, *me31B<sup>C-ter</sup>*, and *me31B<sup>FDF</sup>*  
893 strains localize to the cortex and the germplasm area at the posterior of oocytes, like the  
894 control. However, all three mutant Me31B proteins appear more diffused than the  
895 aggregated Me31B<sup>WT</sup>-GFP proteins in the above areas. The germplasm areas are  
896 indicated by arrowheads. Tral protein (Red channel)'s localization to the cortex and  
897 germplasm was not affected in the three mutants.

898 **Figure 7. Summary of the Me31B motif functions.** This study uses a target-motif-  
899 mutation approach to investigate six functionally important domains/motifs of *Drosophila*



900 Me31B. Our characterization of the generated *me31B* mutants revealed  
901 ATPase/helicase motifs' function in female fertility, oogenesis, and embryogenesis  
902 (DVLARARK, DEAD-box, and HRIGR motifs). An in-depth analysis of the DVLARAK  
903 motif mutation uncovered its function in maintaining *nos* mRNA localization and the  
904 transcript level of *nos* and *osk* mRNA levels. We further showed the Me31B N-terminal  
905 motif, C-terminal motif, and FDF motif-binding motif's function in female fertility and their  
906 different roles in maintaining Me31B protein level and subcellular localization.

# Figure 1

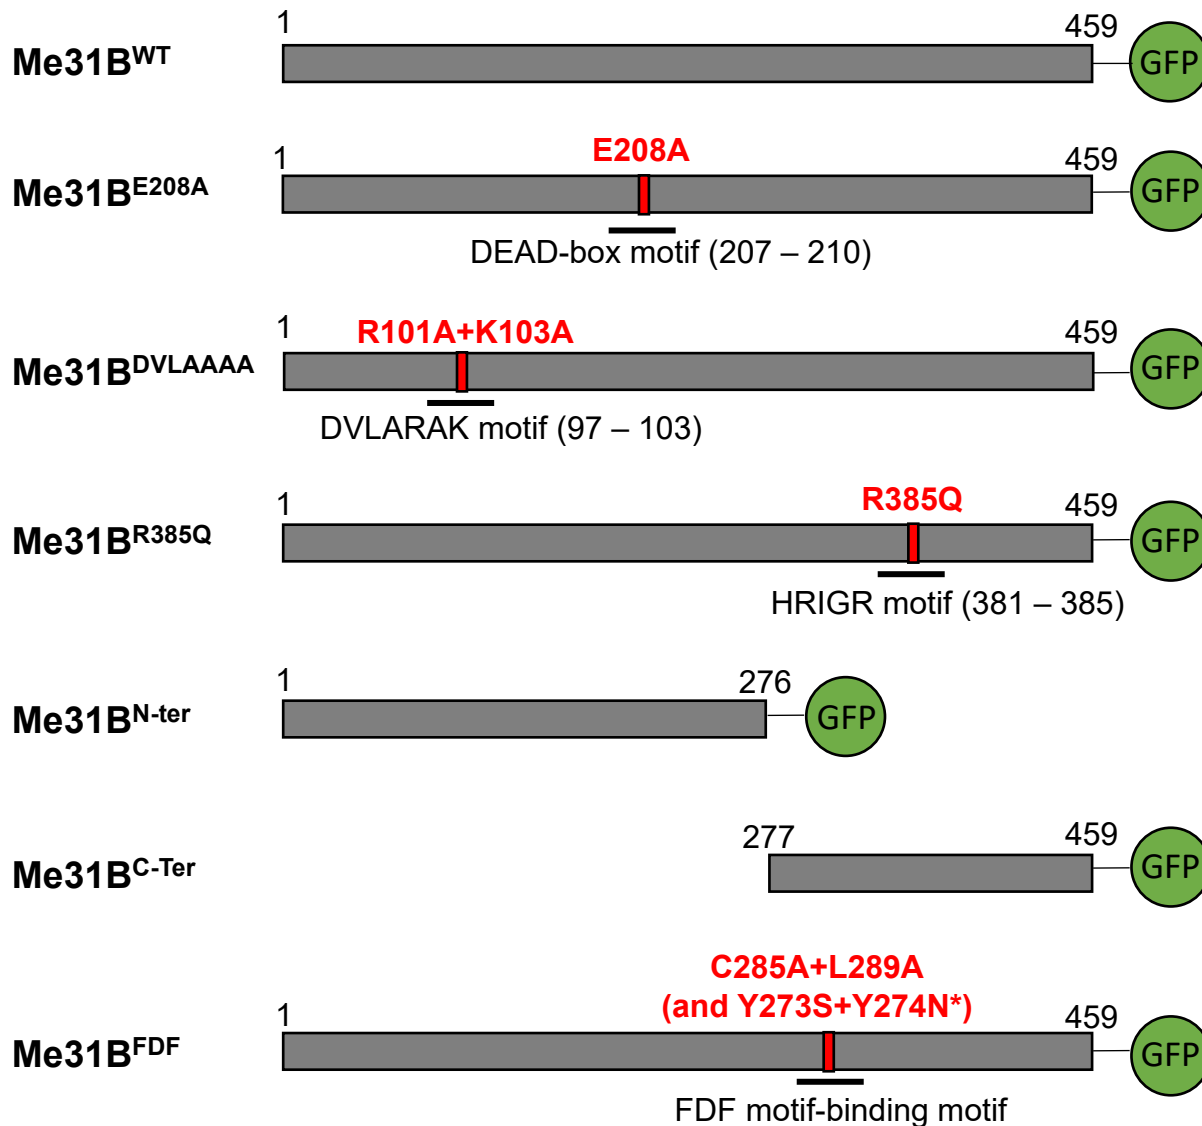

# Figure 2

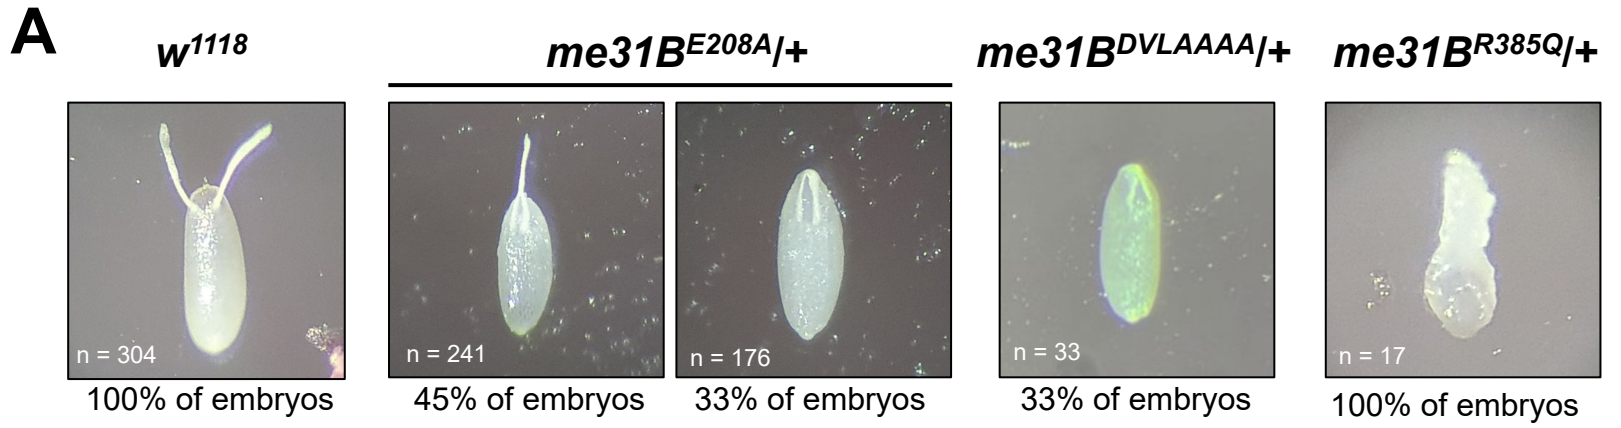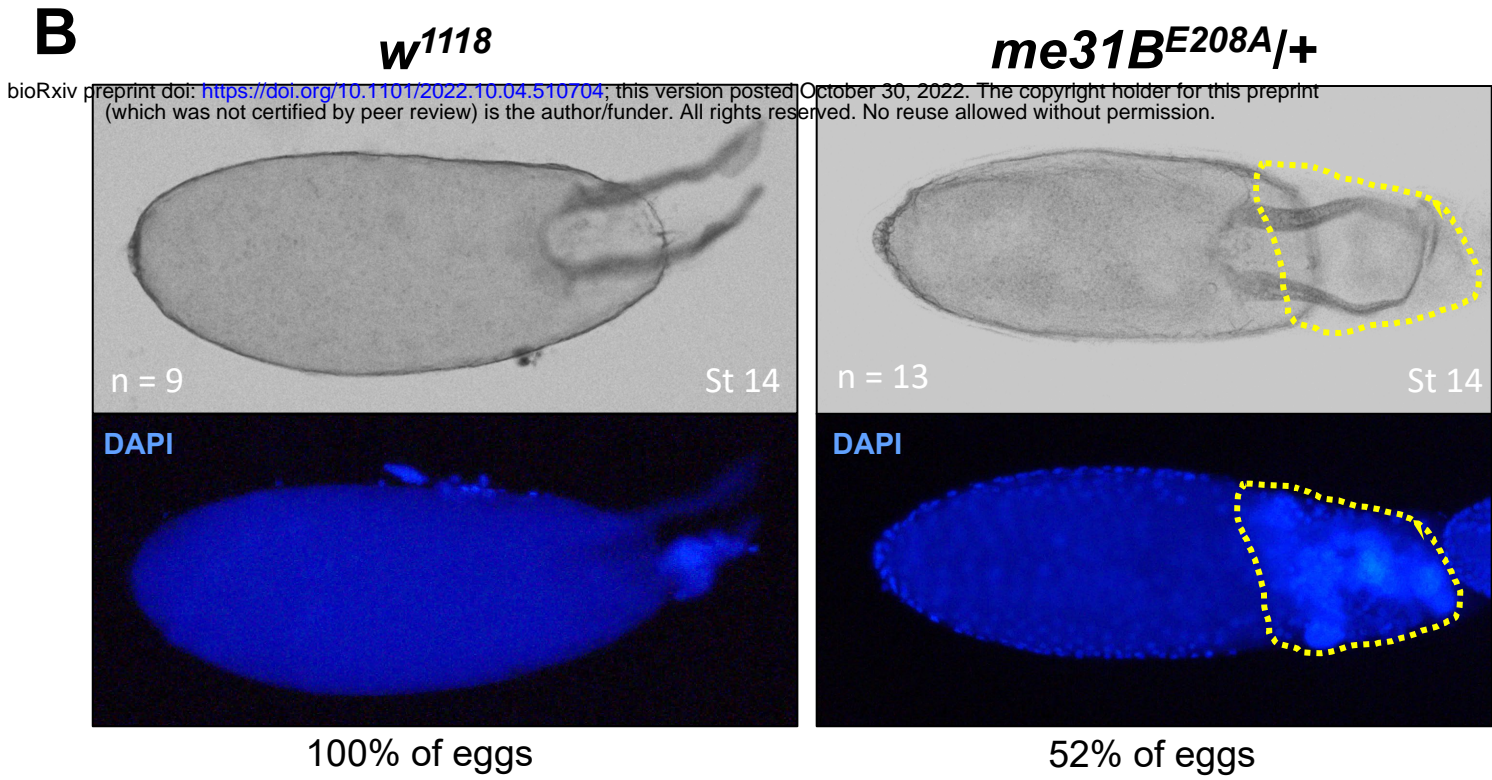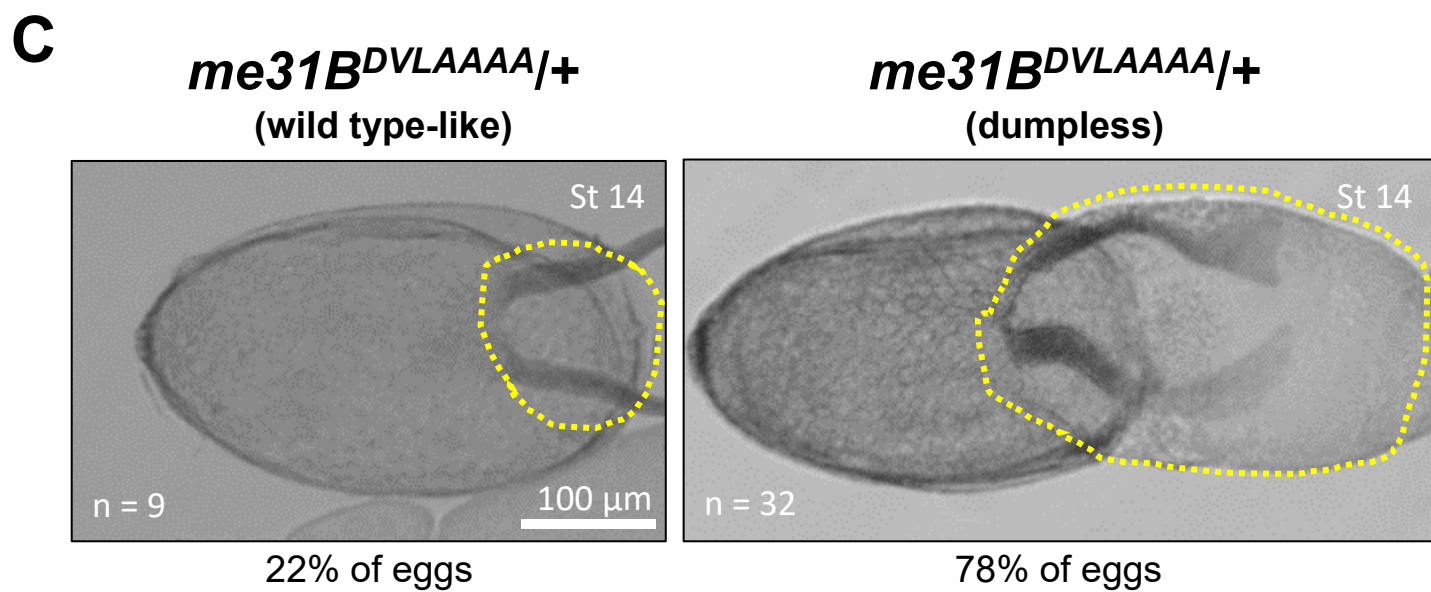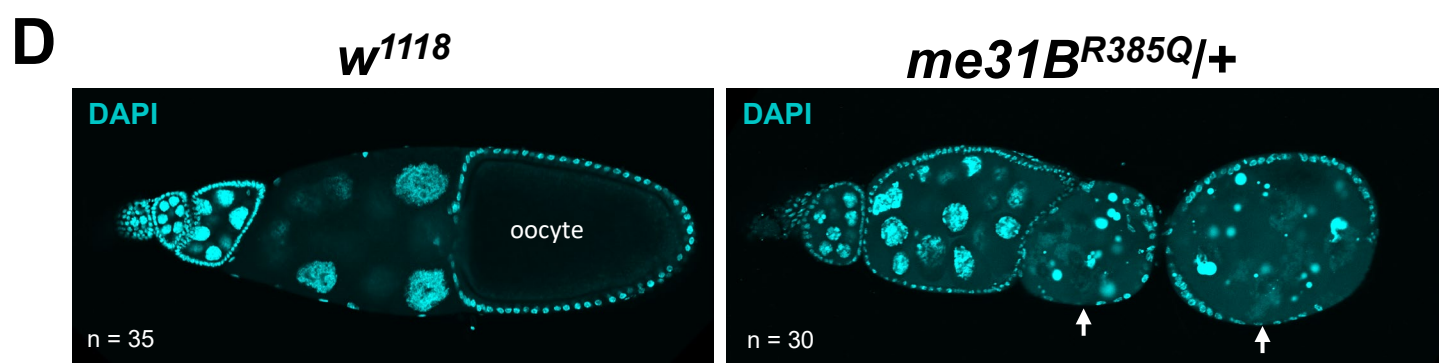



# Figure 3

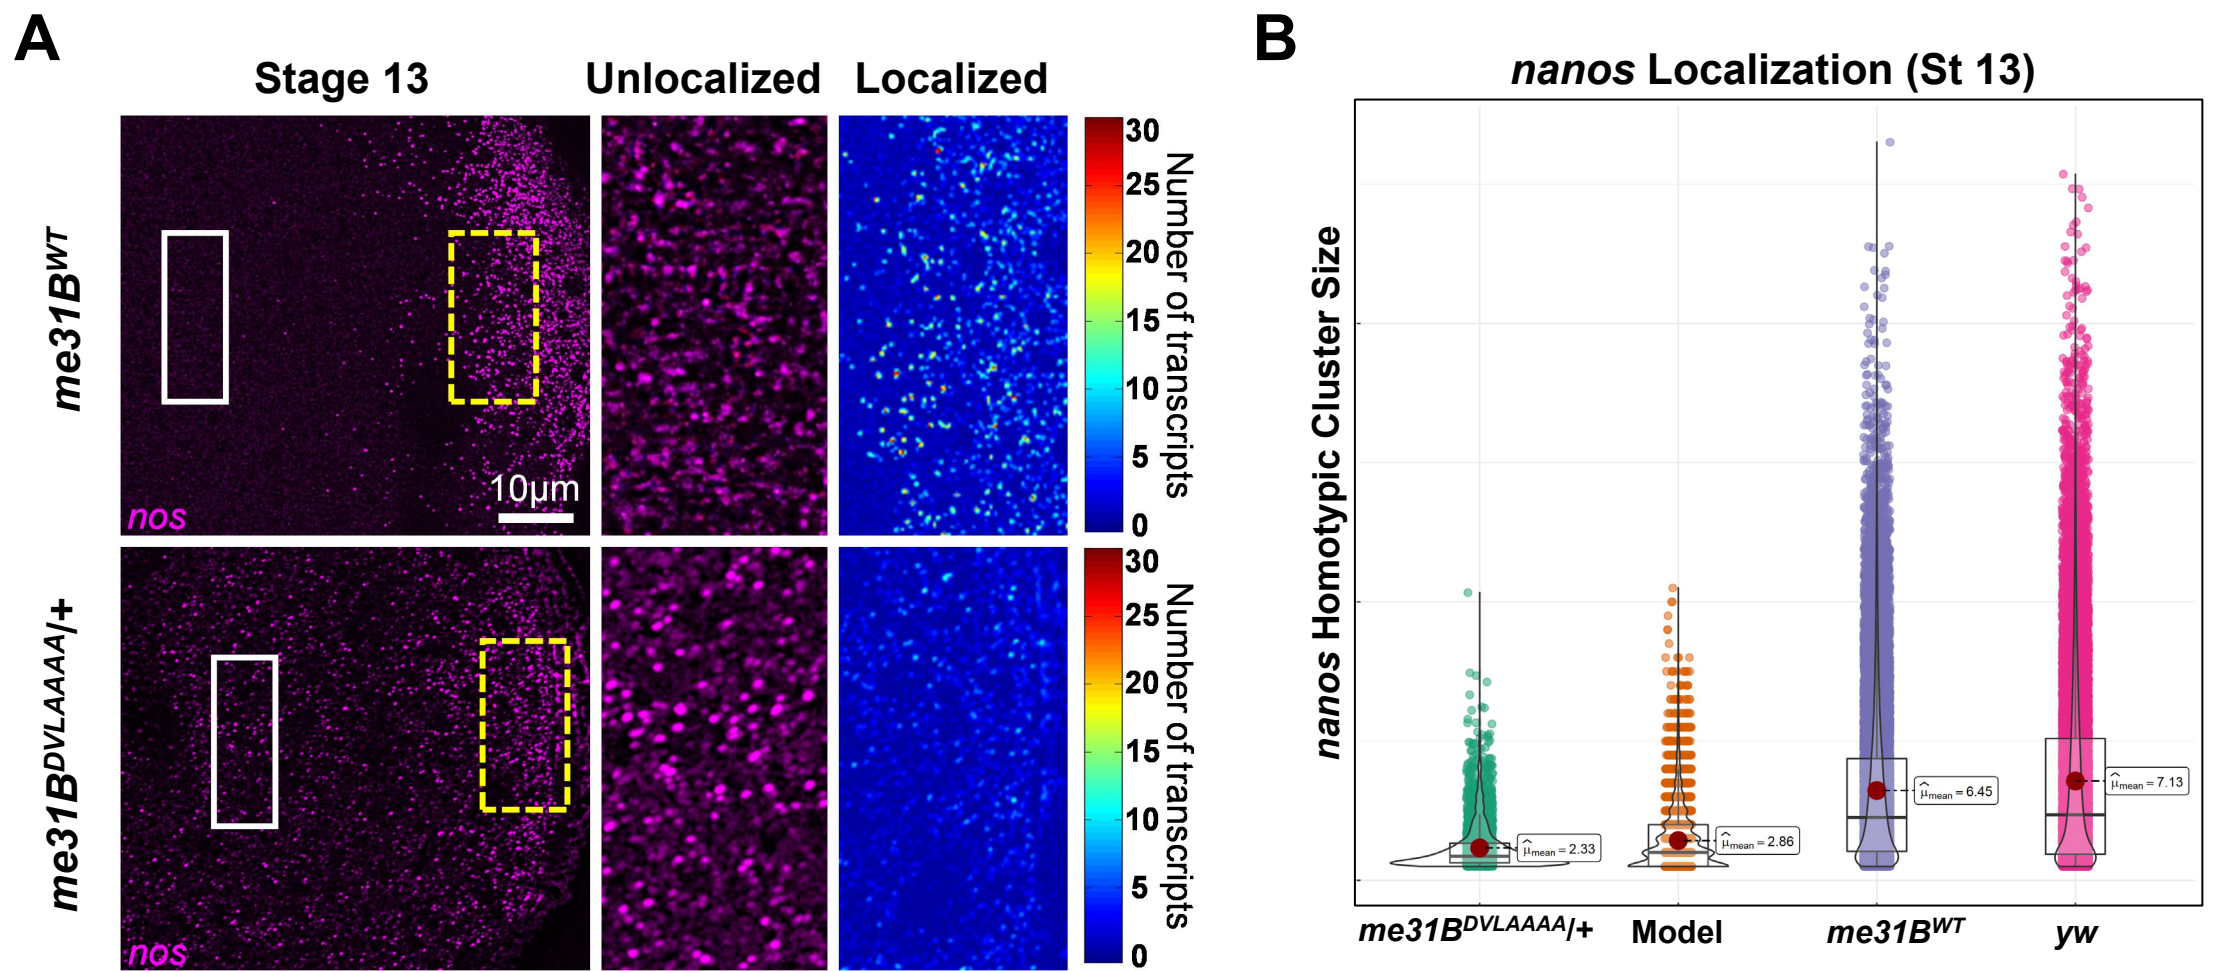

**C** bioRxiv preprint doi: <https://doi.org/10.1101/2022.10.04.510704>; this version posted October 30, 2022. The copyright holder for this preprint (which was not certified by peer review) is the author/funder. All rights reserved. No reuse allowed without permission.

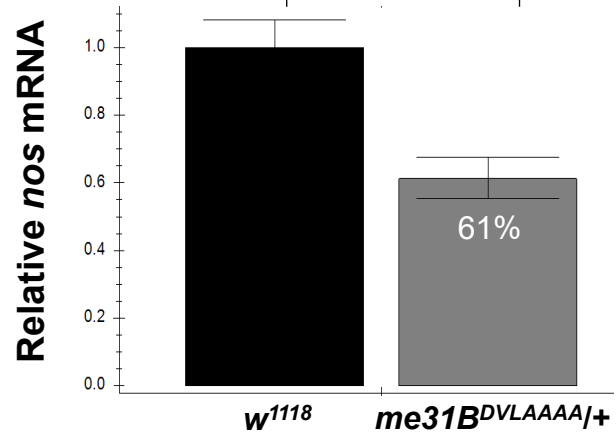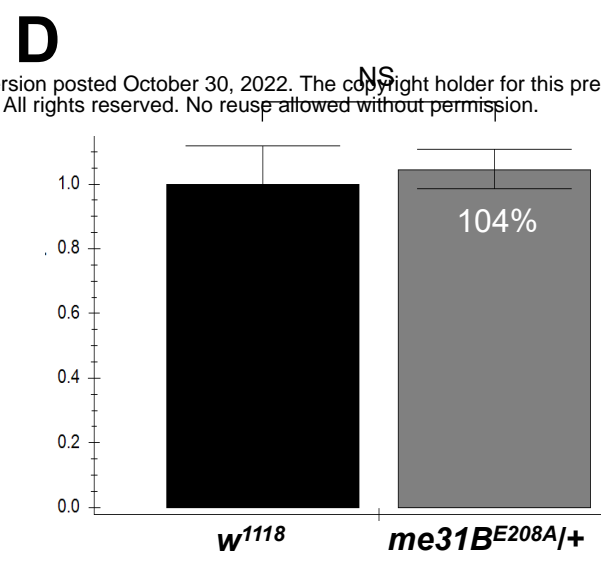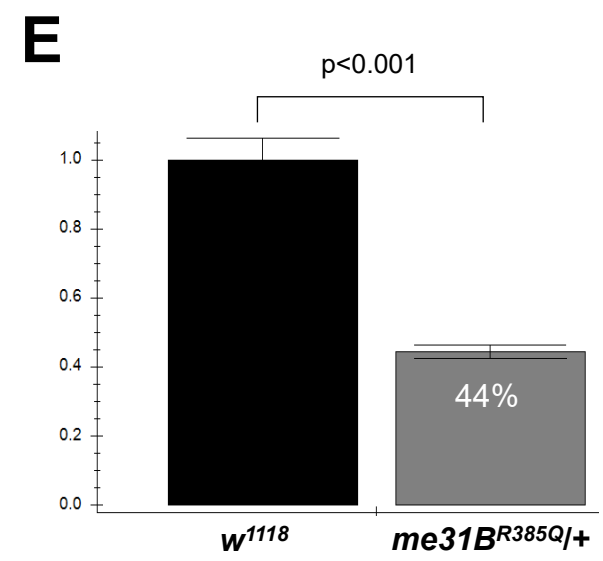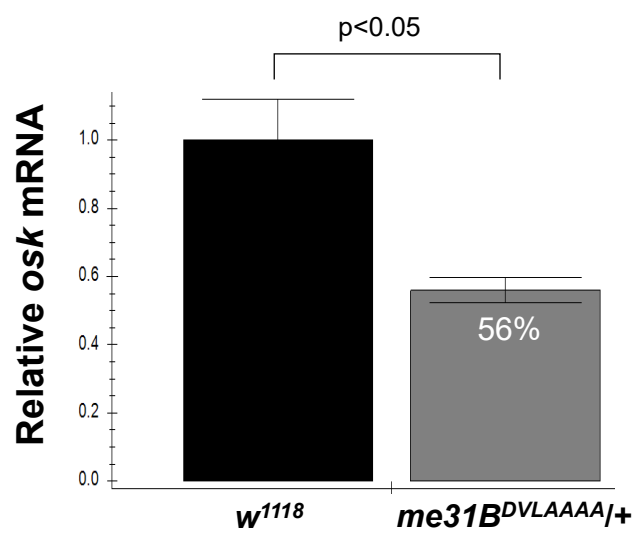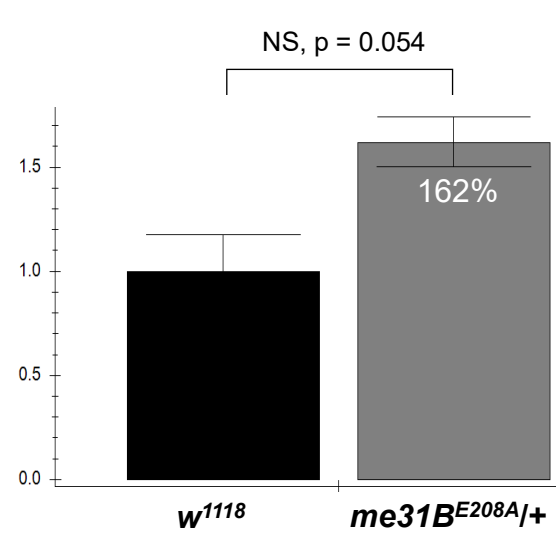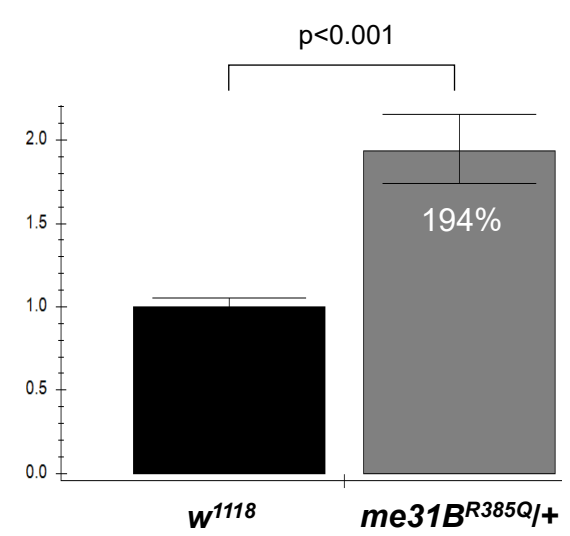

# Figure 4

## A

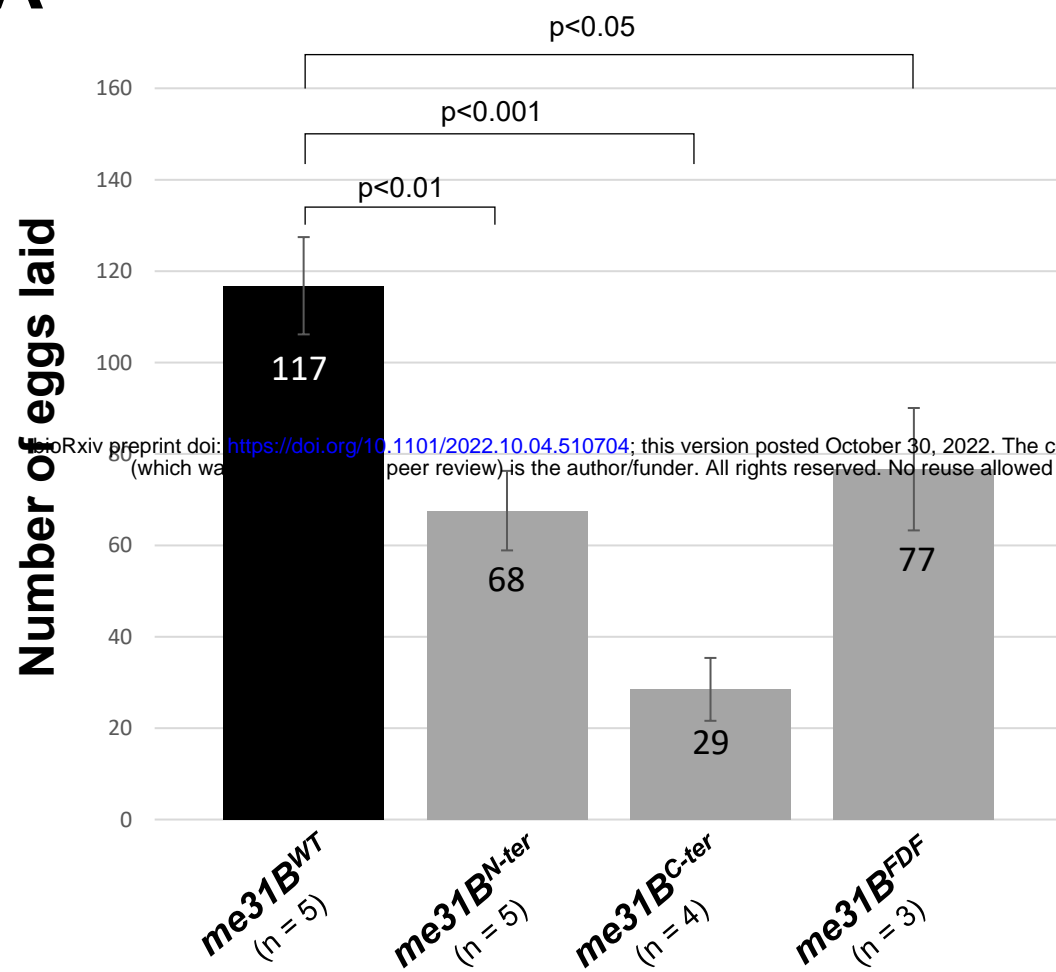

## B

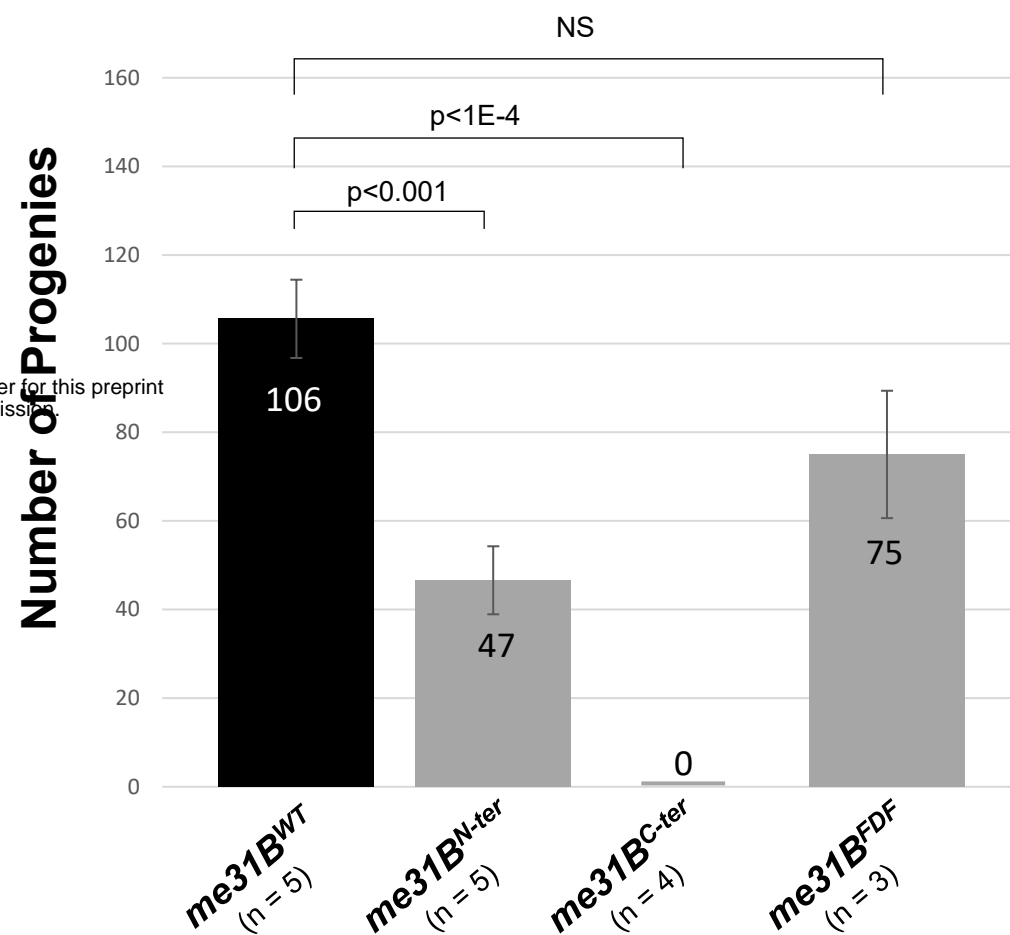

## C

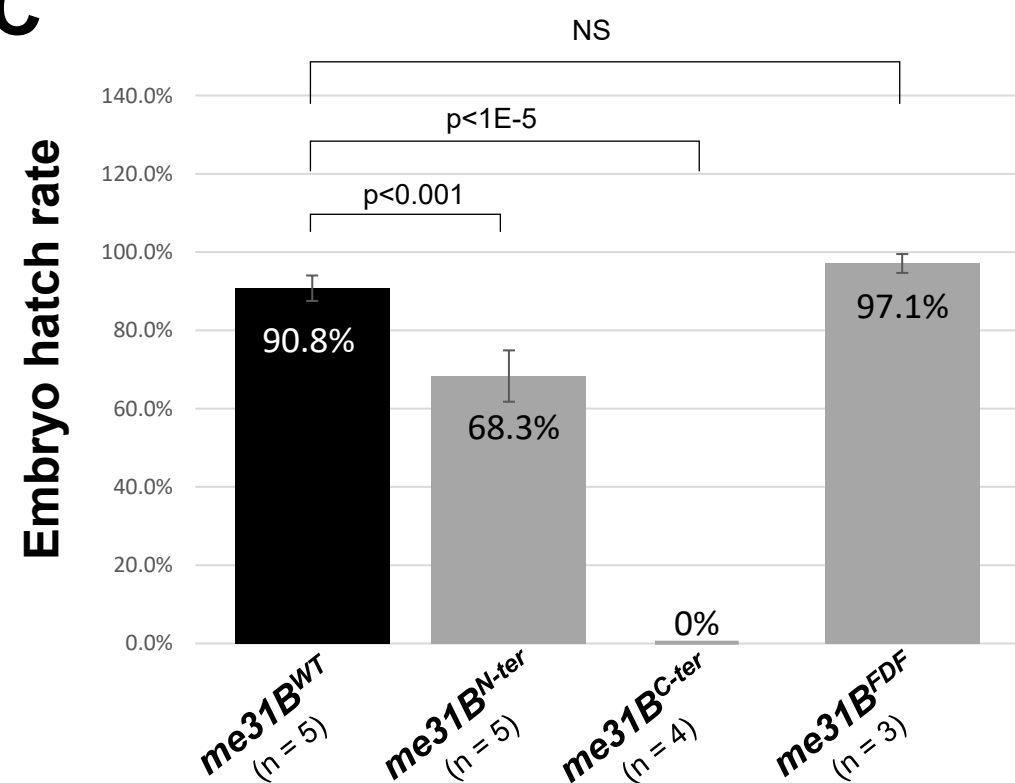

## D

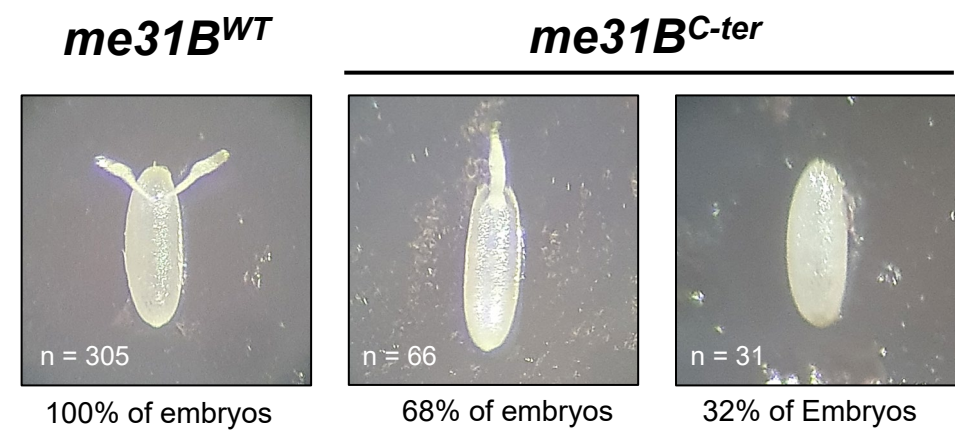

# Figure 5

## A

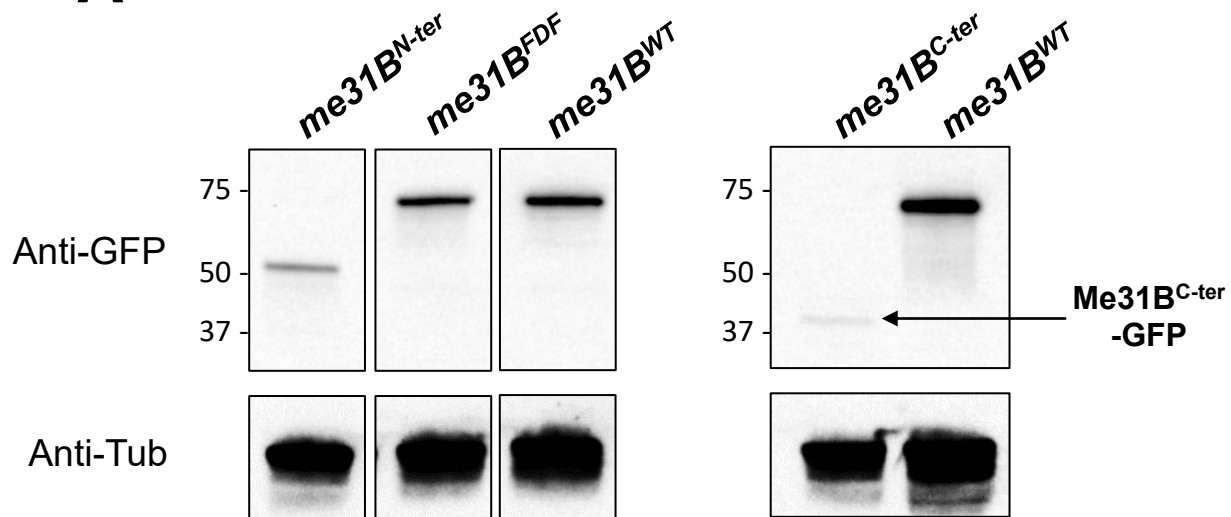

## B

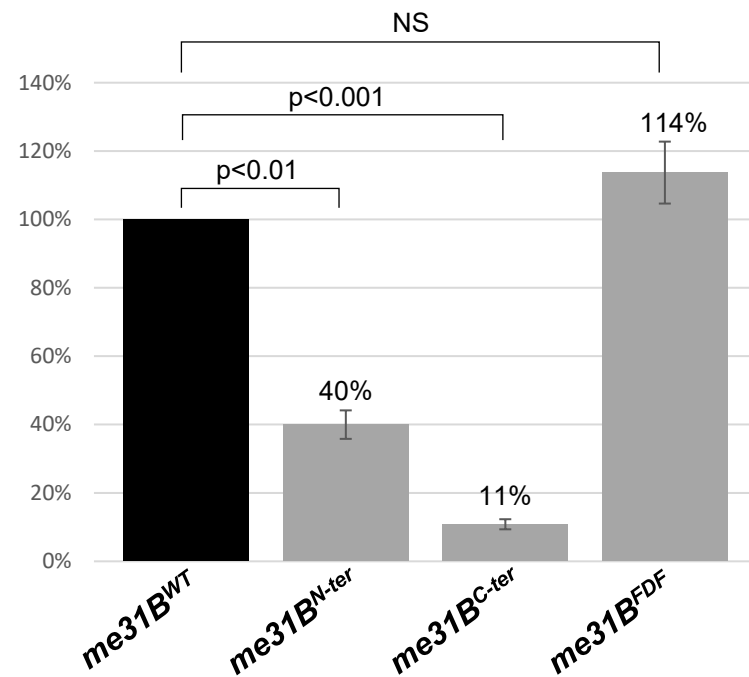



# Figure 6

## A

Early stage (st 3 – 4) egg chamber

Me31B-GFP      Tral      Merge

*me31B<sup>WT</sup>*  
(n = 10)

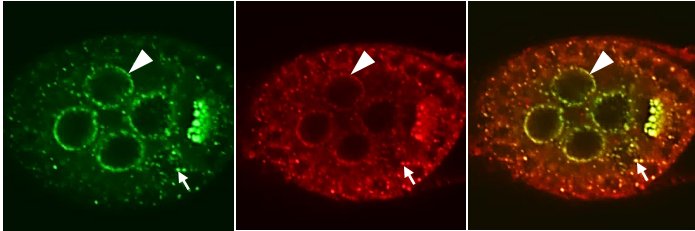

*me31B<sup>N-ter</sup>*  
(n = 10)

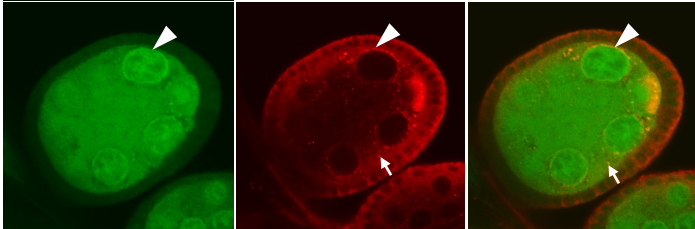

*me31B<sup>C-ter</sup>*  
(n = 10)

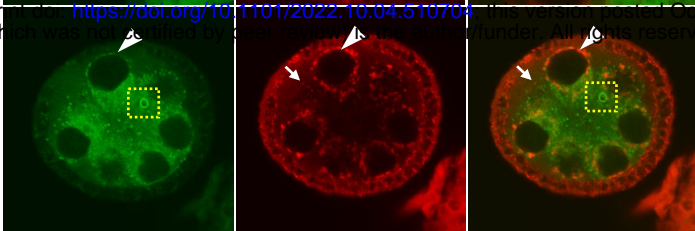

*me31B<sup>FDF</sup>*  
(n = 10)

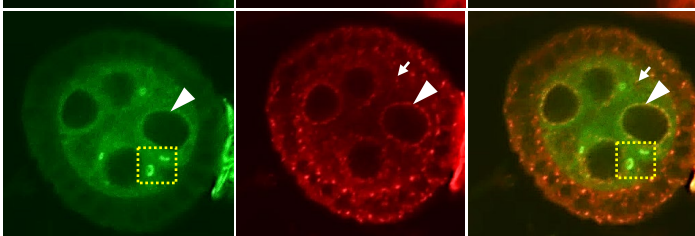

## B

Early-to-mid stage (st 5 – 7) egg chamber

Me31B-GFP      Tral      Merge

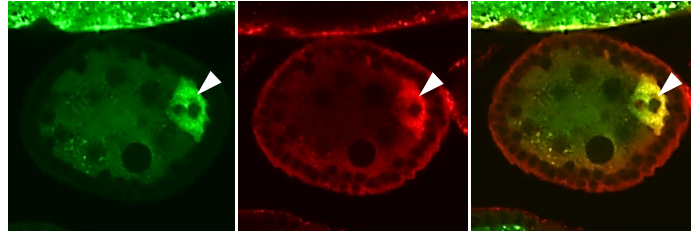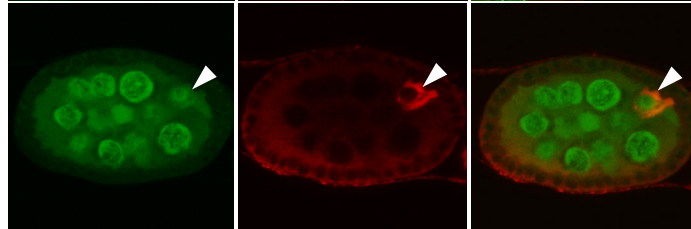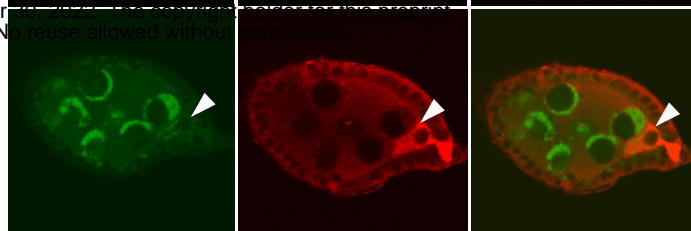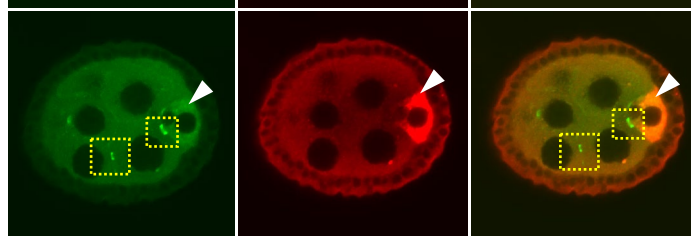

## C

Mid stage (st 9 – 10) egg chamber

Me31B-GFP      Tral      Merge

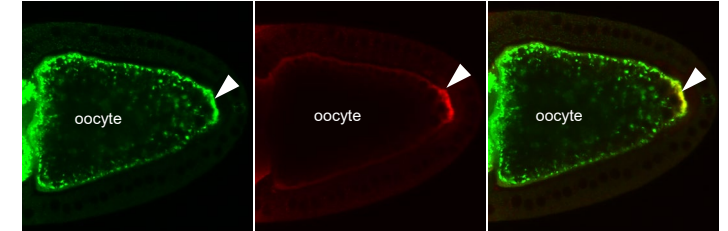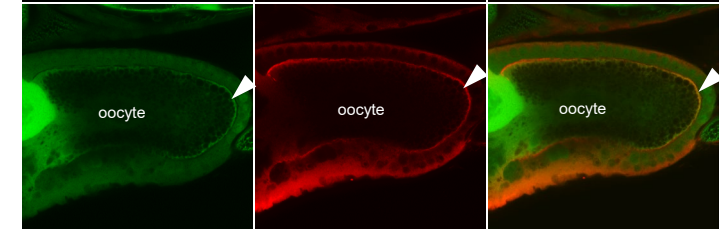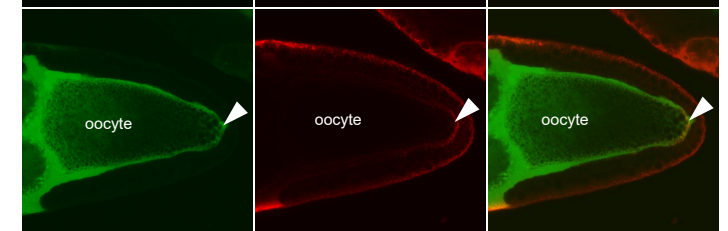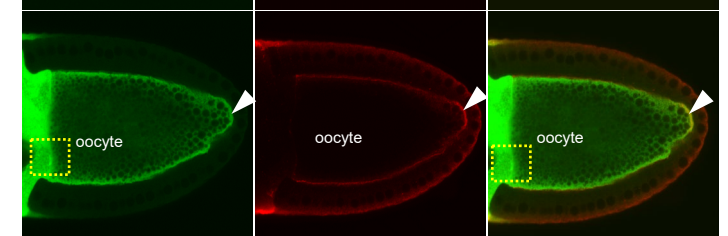

bioRxiv preprint doi: <https://doi.org/10.1101/2022.10.04.510704>; this version posted October 10, 2022. The copyright holder for this preprint (which was not certified by peer review) is the author/funder. All rights reserved. No reuse allowed without permission.

# Figure 7

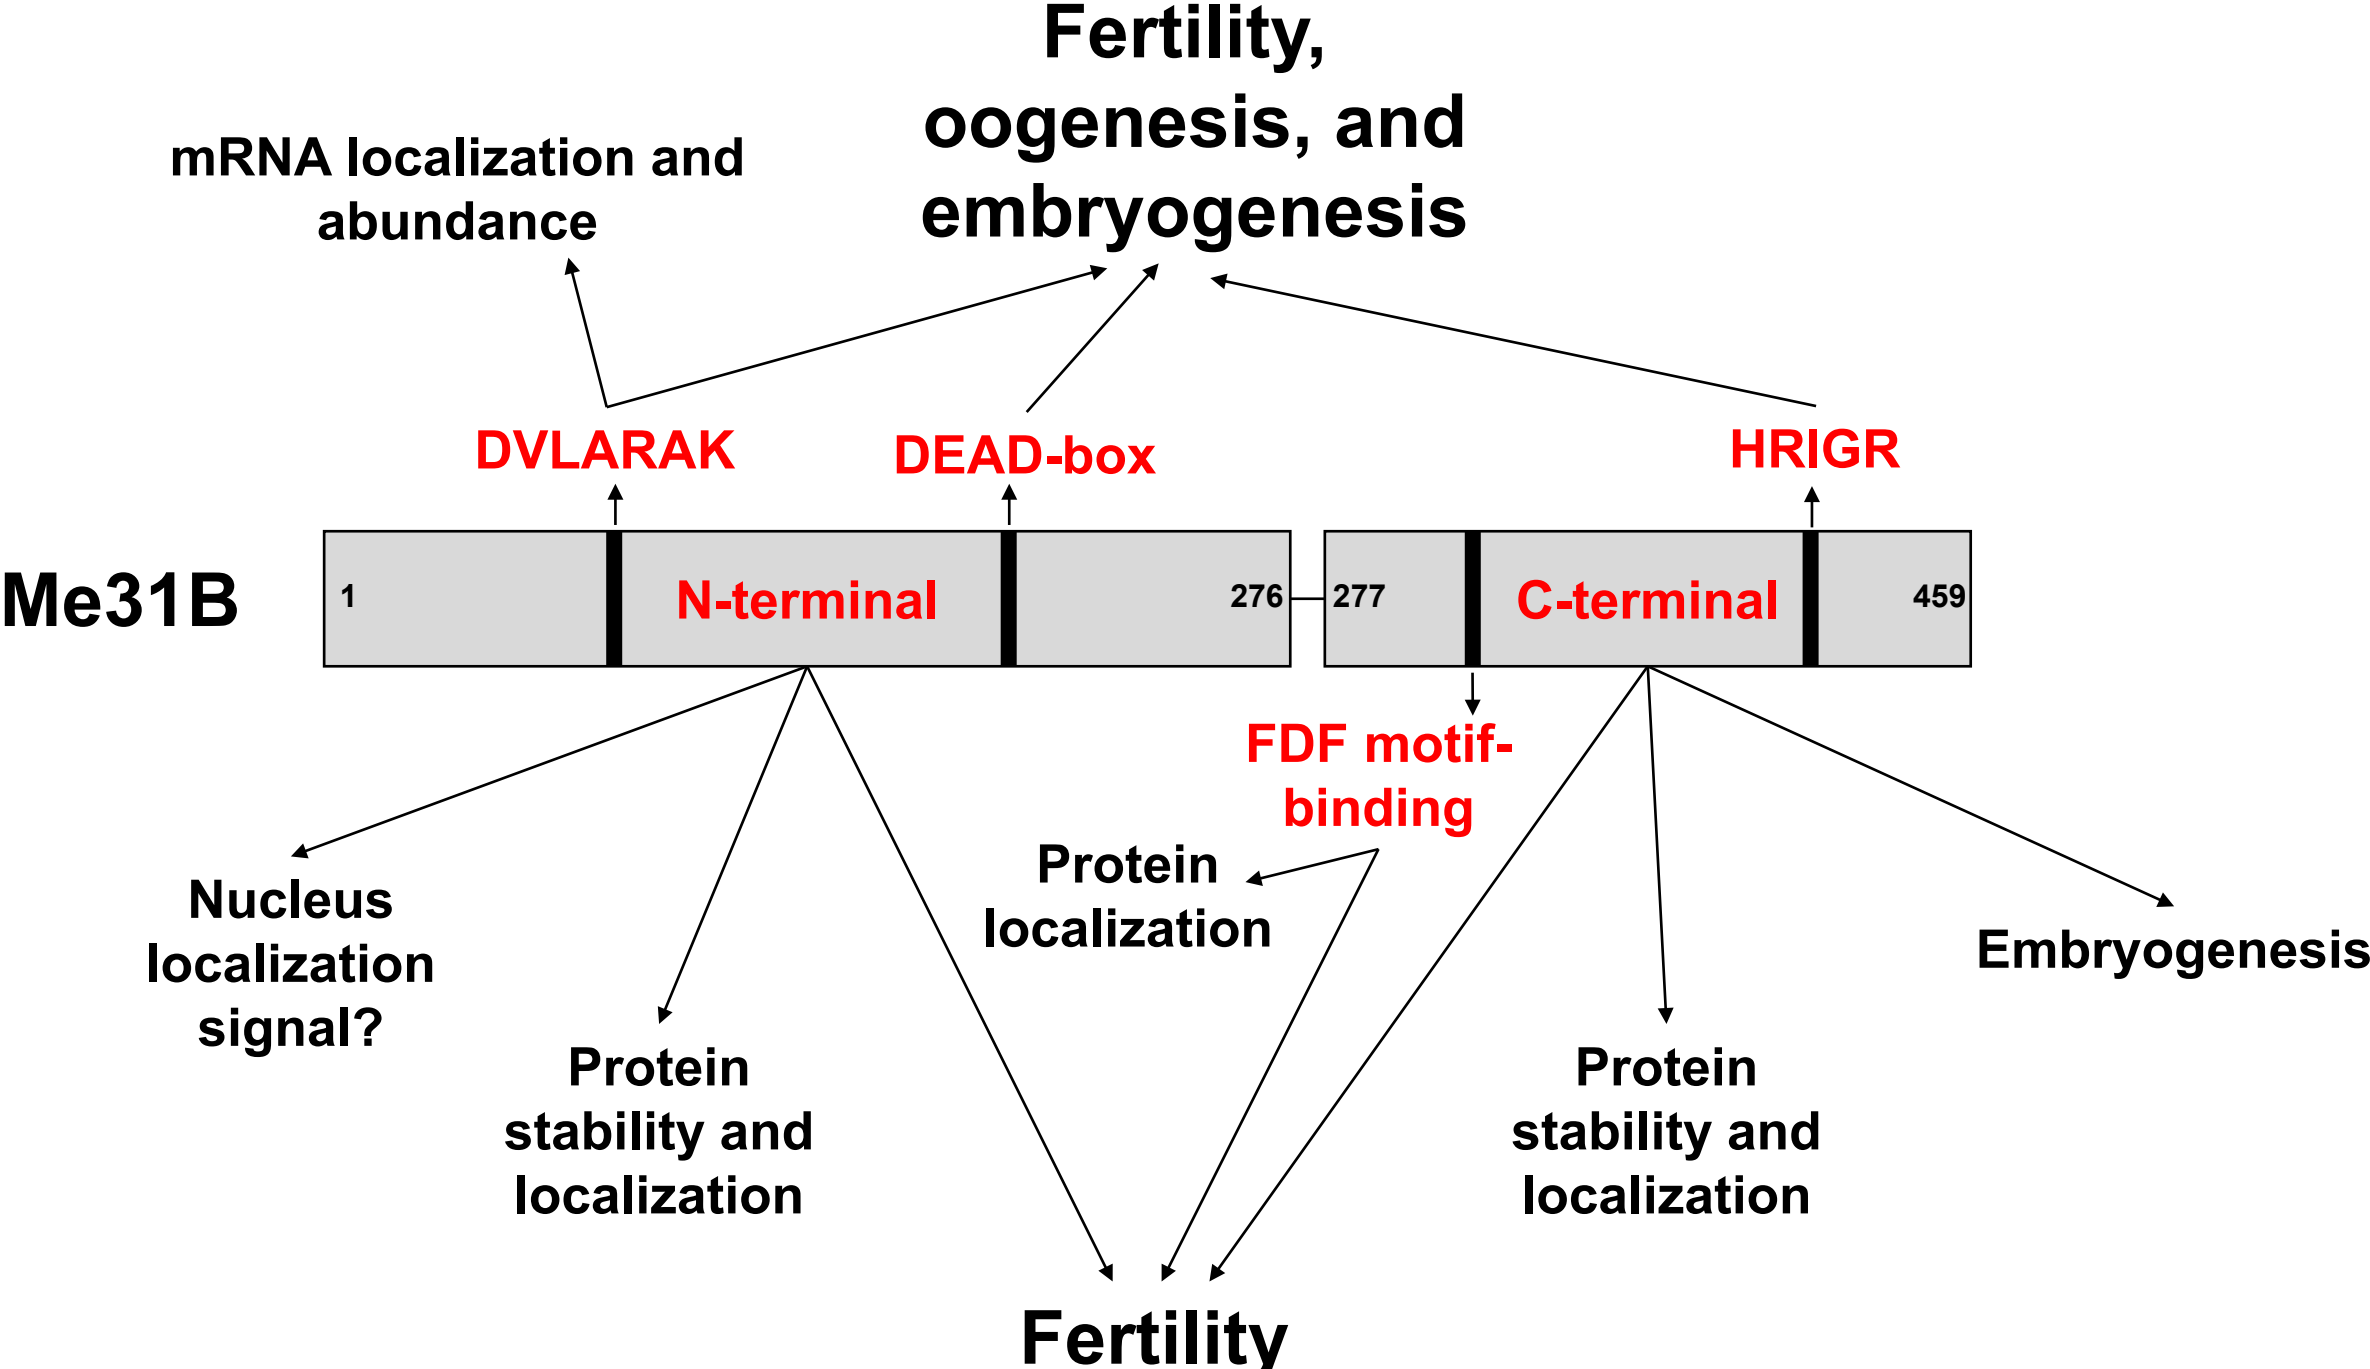

Source: https://www.biorxiv.org/content/10.1101/2022.10.04.510704v2.full.pdf
